# Supplementary material for: New ruthenium(ii) coordination compounds possessing bidentate aminomethylphosphane ligands: synthesis, characterization and preliminary biological study in vitro
Source: Royal Society of Chemistry journal article supplement (doi:10.1039/c5dt01119a), 2015-01-01
Supplement: c5dt01119a1.pdf [file c5dt01119a1.pdf]

## New ruthenium(II) coordination compounds possessing bidentate aminomethylphosphane ligands: synthesis, characterization and preliminary biological study *in vitro*

Michał Plotek,<sup>a,b</sup> Radosław Starosta,<sup>\*c</sup> Urszula K. Komarnicka,<sup>c</sup> Agnieszka Skórska-Stania,<sup>a</sup> Małgorzata Jeżowska-Bojczuk,<sup>c</sup> Grażyna Stochel<sup>a</sup> and Agnieszka Kyzioł<sup>\*a</sup>

<sup>a</sup> Faculty of Chemistry, Jagiellonian University in Krakow, Ingardena 3, 30-060 Krakow, Poland

<sup>b</sup> Faculty of Conservation and Restoration of Works of Art, Jan Matejko Academy of Fine Arts in Krakow, Lea 27-29, 30-052 Krakow, Poland

<sup>c</sup> Faculty of Chemistry, University of Wrocław, Joliot-Curie 14, 50-383 Wrocław, Poland

\* corresponding authors: AK - [kyziol@chemia.uj.edu.pl](mailto:kyziol@chemia.uj.edu.pl); RS- [radoslaw.starosta@chem.uni.wroc.pl](mailto:radoslaw.starosta@chem.uni.wroc.pl)

Addition of aminomethylphosphanes  $P\{CH_2N(CH_2CH_2)_2O\}_3$  (**1**),  $PPh_2\{CH_2N(CH_2CH_2)_2O\}$  (**2**) or  $PPh_2\{CH_2N(CH_2CH_2)_2NCH_2CH_3\}$  (**3**) to methanolic solution of  $RuCl_3$  results in reduction of ruthenium(III) ion giving finally *ttt*- $[RuCl_2(\mathbf{1})_2]$  (**1A**), *ttt*- $[RuCl_2(\mathbf{2})_2]$  (**2A**) and *ttt*- $[RuCl_2(\mathbf{3})_2]$  (**3A**). Synthesized complexes are the first examples of ruthenium(II) coordination compounds possessing aminomethylphosphanes chelating *via* phosphorus and nitrogen atoms. They were fully characterized (NMR, ESI-MS, IR, elemental analysis, X-ray crystallography). Preliminary studies of the *in vitro* cytotoxicity against A549 cell line (human lung adenocarcinoma) and interactions with human serum proteins (albumin and apotransferrin) showed the moderate activity of the complexes. Interestingly, the P,N-chelation leads to formation of strained 4-membered Ru-P-C-N-Ru rings, which in the case of **2A** and **3A** undergo opening in the presence of  $CH_3CN$ , which results in rearrangement to *ctc*- $[RuCl_2(\mathbf{2})_2(CH_3CN)_2]$  (**2B**) and *ctc*- $[RuCl_2(\mathbf{3})_2(CH_3CN)_2]$  (**3B**).

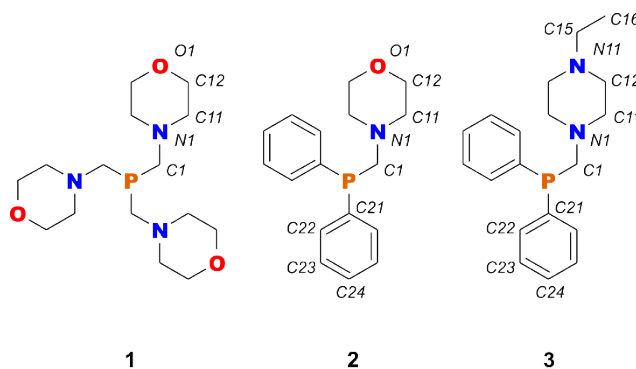

**Fig. S1** Structures of aminomethylphosphanes with atom numbering scheme (every hydrogen has the same number as directly bound carbon atom):  $P\{CH_2N(CH_2CH_2)_2O\}_3$  (**1**),  $PPh_2\{CH_2N(CH_2CH_2)_2O\}$  (**2**) and  $PPh_2\{CH_2N(CH_2CH_2)_2NCH_2CH_3\}$  (**3**).

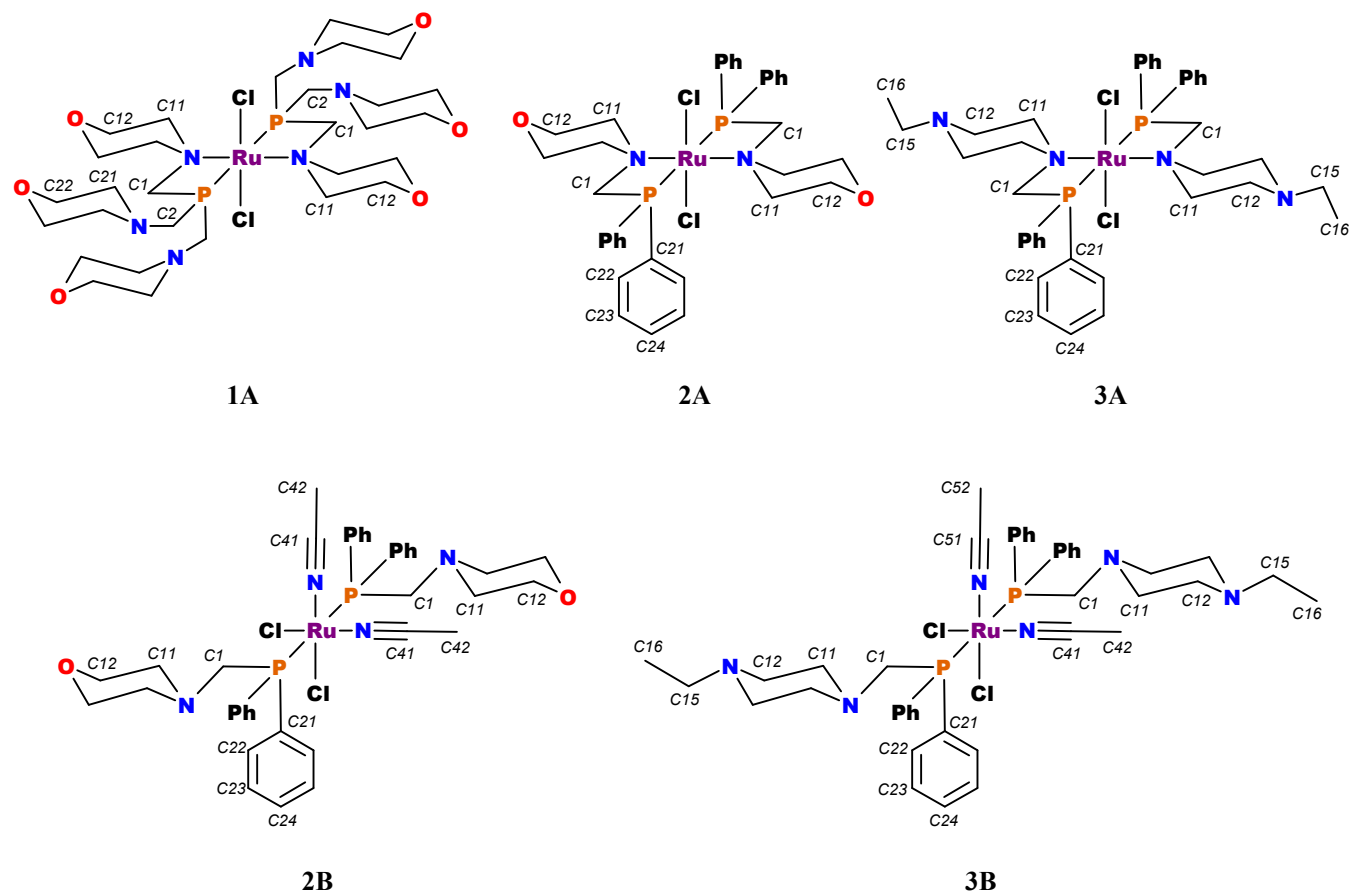

**Fig. S2** Schematic structures of synthesized complexes (every hydrogen has the same number as directly bound carbon atom):  
*t**t**t*-[RuCl<sub>2</sub>(P{CH<sub>2</sub>N(CH<sub>2</sub>CH<sub>2</sub>)<sub>2</sub>O}<sub>3</sub>)]<sub>2</sub> (**1A**),  
*t**t**t*-[RuCl<sub>2</sub>(PPh<sub>2</sub>{CH<sub>2</sub>N(CH<sub>2</sub>CH<sub>2</sub>)<sub>2</sub>O})<sub>2</sub>)] (**2A**),  
*t**t**t*-[RuCl<sub>2</sub>(PPh<sub>2</sub>{CH<sub>2</sub>N(CH<sub>2</sub>CH<sub>2</sub>)<sub>2</sub>NCH<sub>2</sub>CH<sub>3</sub>})<sub>2</sub>)] (**3A**),  
*c**t**c*-[RuCl<sub>2</sub>(PPh<sub>2</sub>{CH<sub>2</sub>N(CH<sub>2</sub>CH<sub>2</sub>)<sub>2</sub>O})<sub>2</sub>(CH<sub>3</sub>CN)<sub>2</sub>)] (**2B**) and  
*c**t**c*-[RuCl<sub>2</sub>(PPh<sub>2</sub>{CH<sub>2</sub>N(CH<sub>2</sub>CH<sub>2</sub>)<sub>2</sub>NCH<sub>2</sub>CH<sub>3</sub>})<sub>2</sub>(CH<sub>3</sub>CN)<sub>2</sub>)] (**3B**)

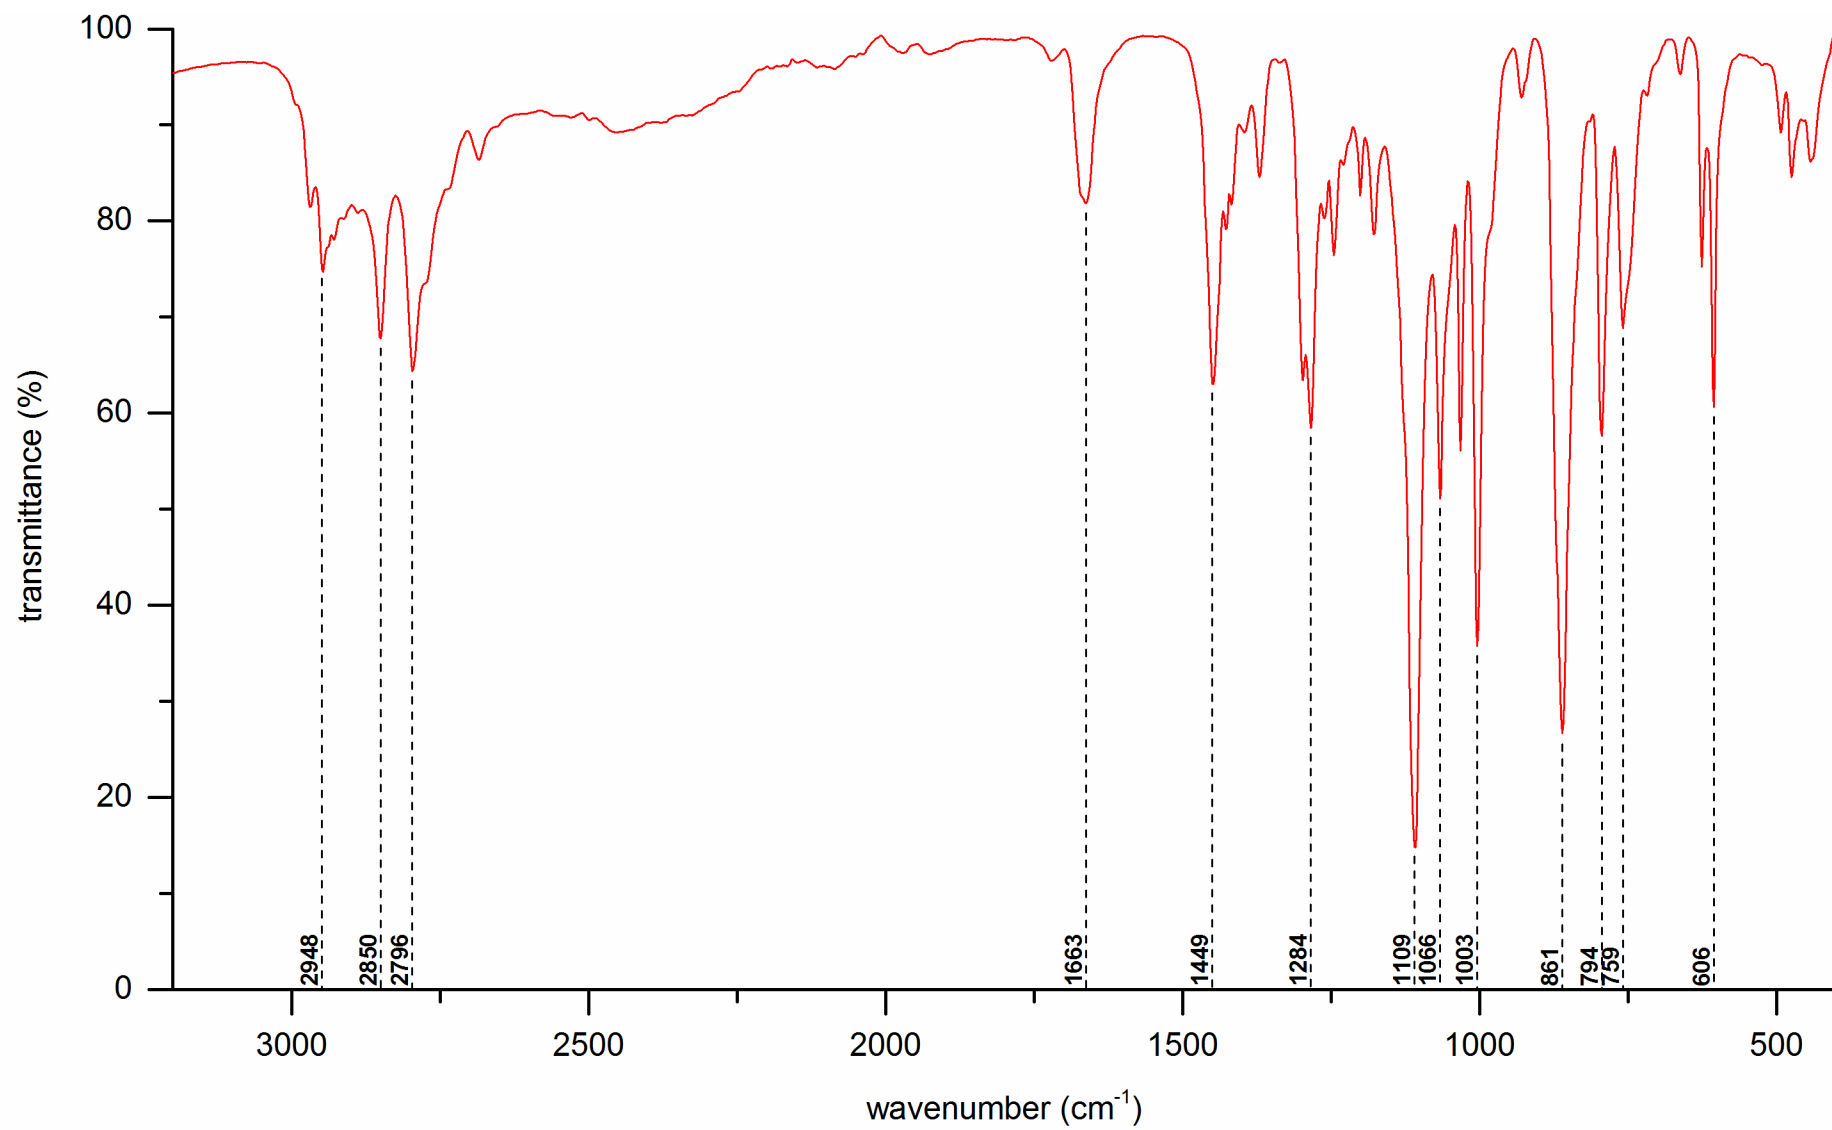

**Fig. S3** Infrared spectrum of  $P\{CH_2N(CH_2CH_2)_2O\}_3$  (1).

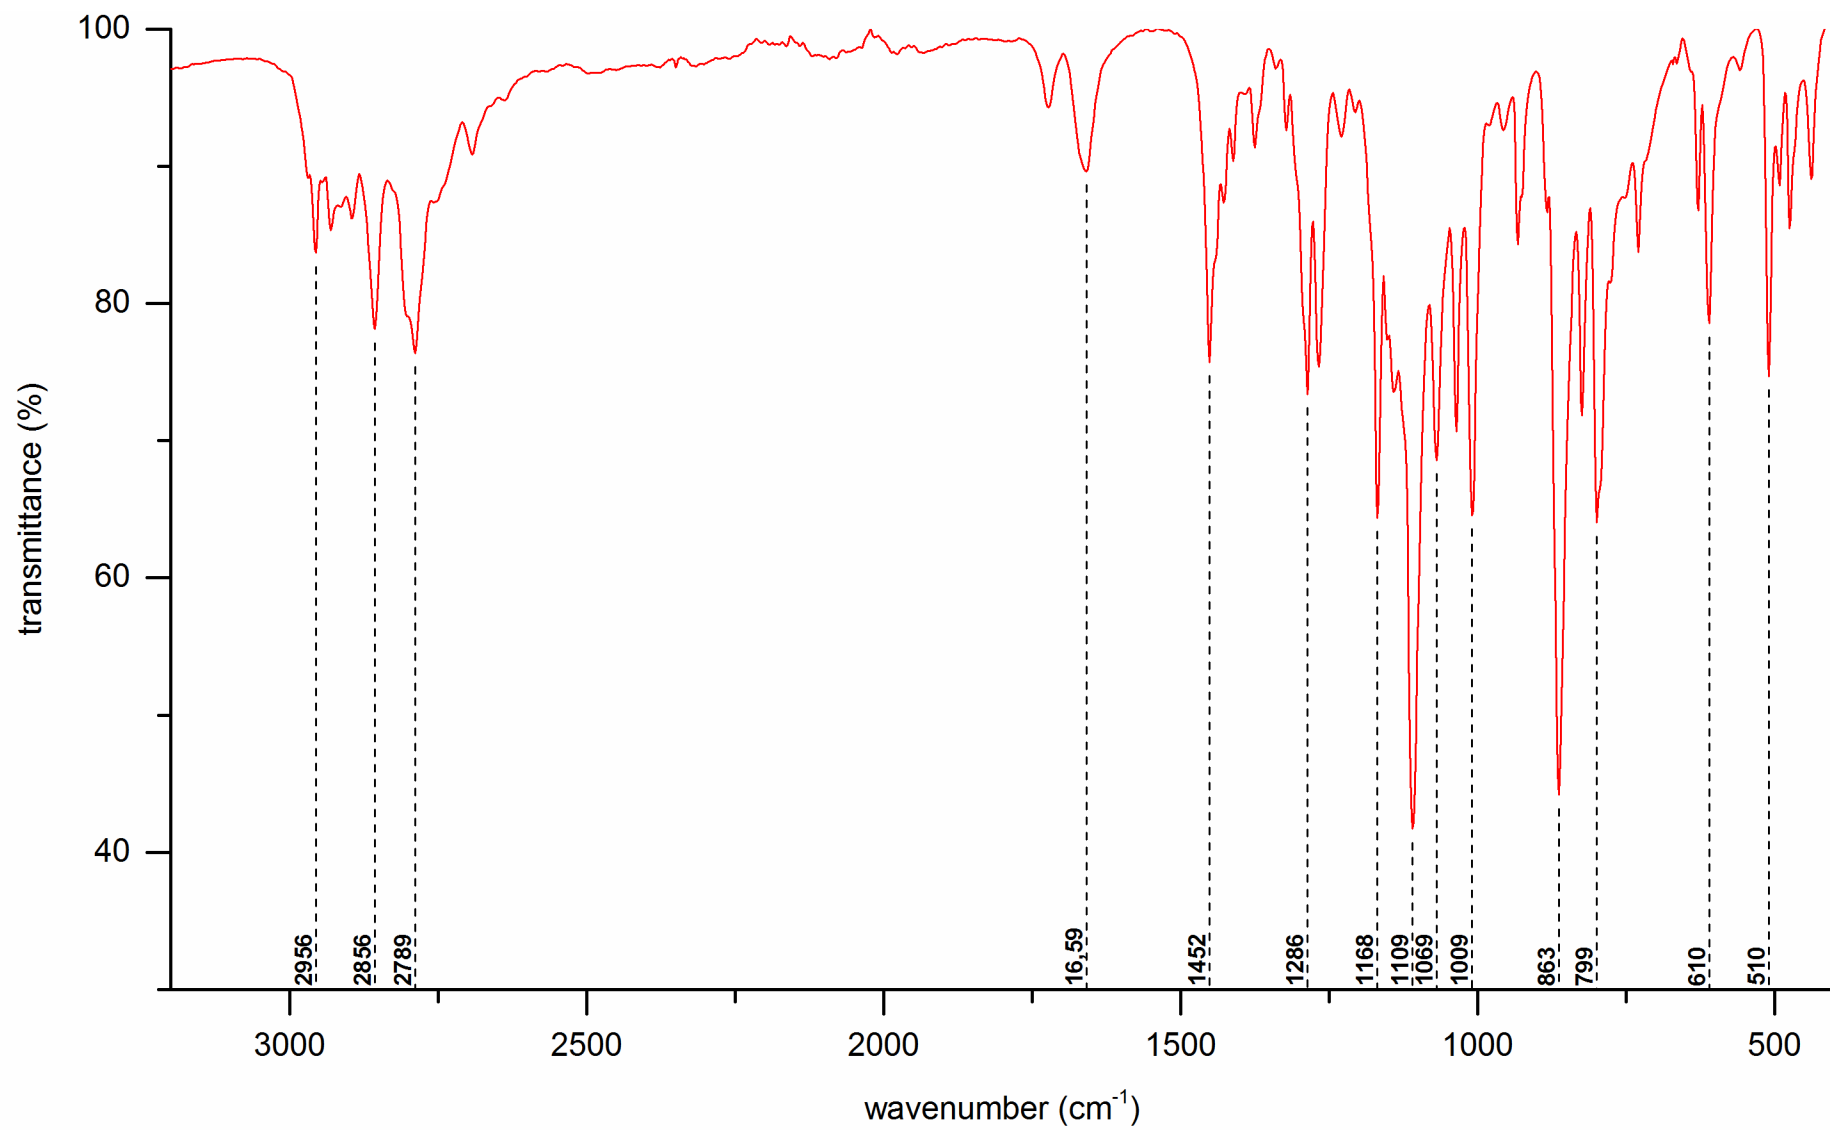

**Fig. S4** Infrared spectrum of OP{CH<sub>2</sub>N(CH<sub>2</sub>CH<sub>2</sub>)<sub>2</sub>O}<sub>3</sub> (**10**).

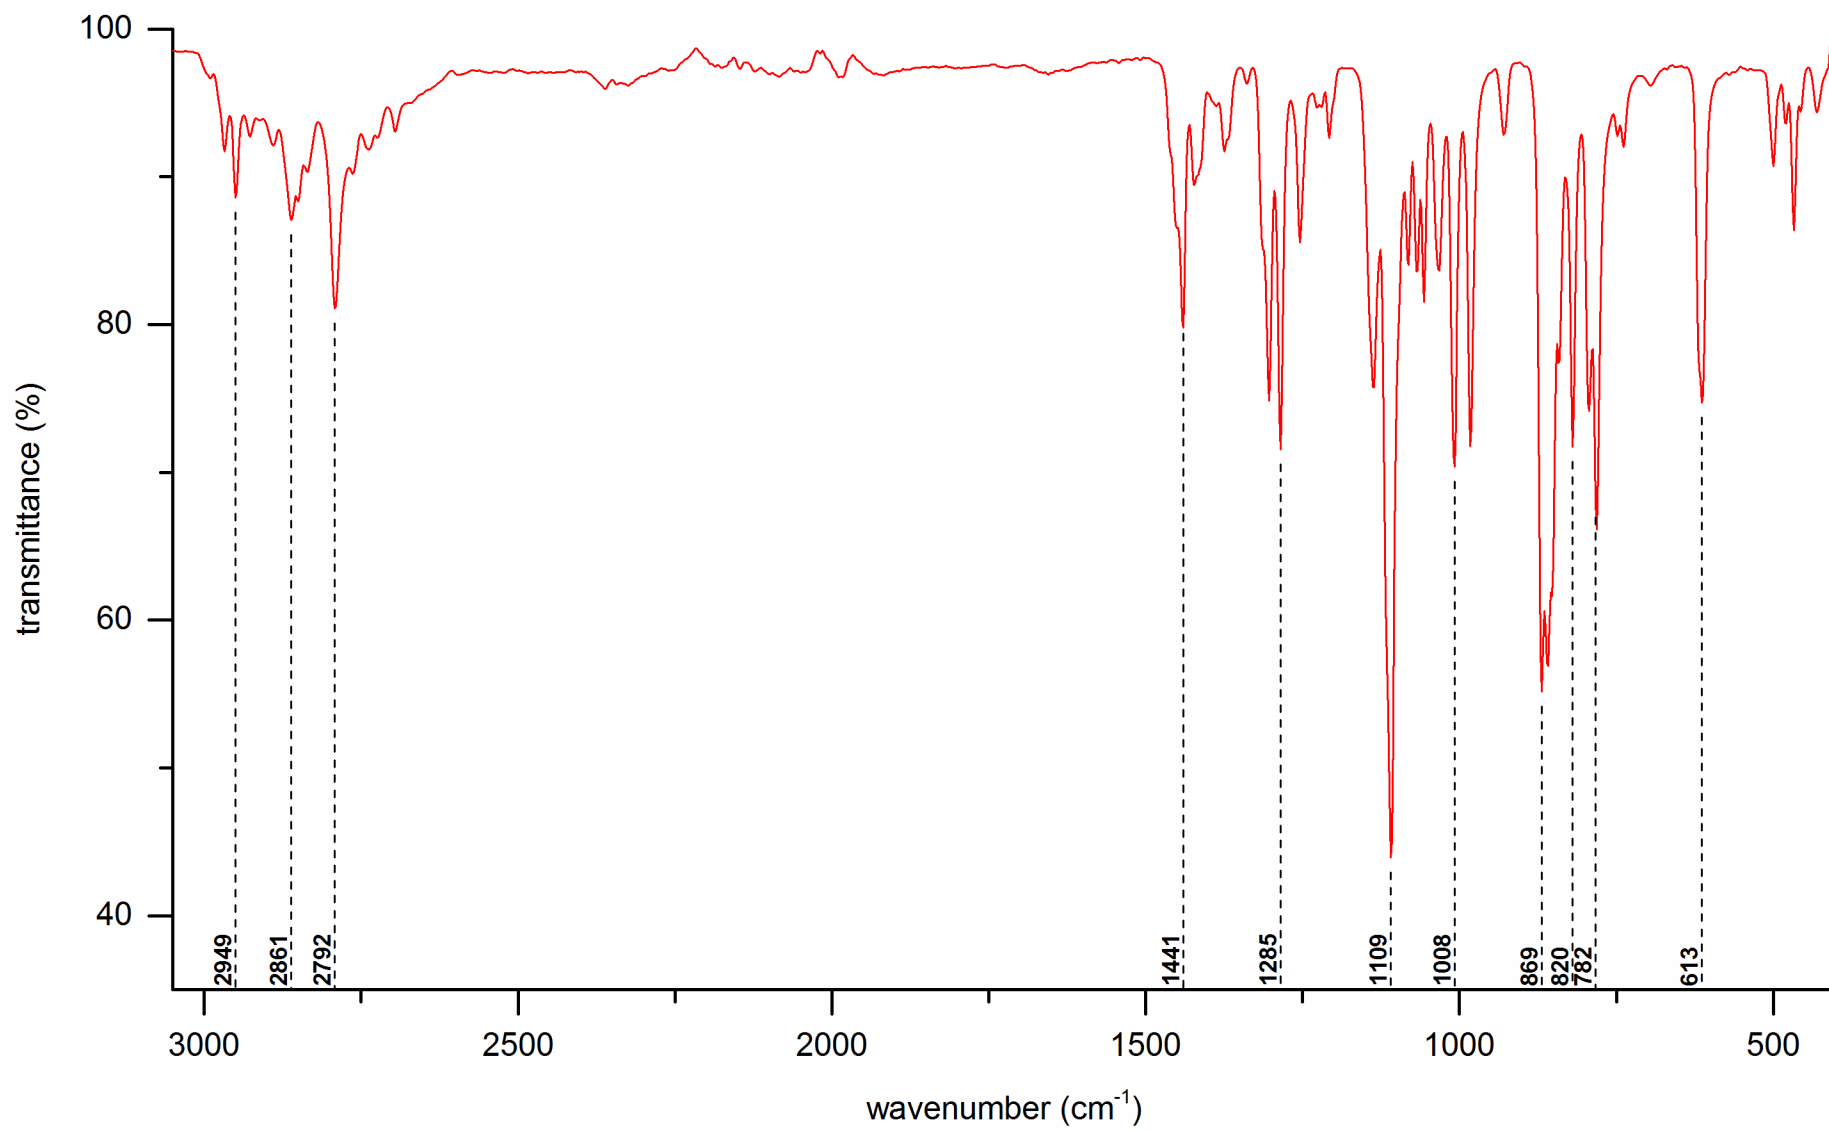

**Fig. S5** Infrared spectrum of [RuCl<sub>2</sub>(P{CH<sub>2</sub>N(CH<sub>2</sub>CH<sub>2</sub>)<sub>2</sub>O}<sub>3</sub>)<sub>2</sub>] (**1A**).

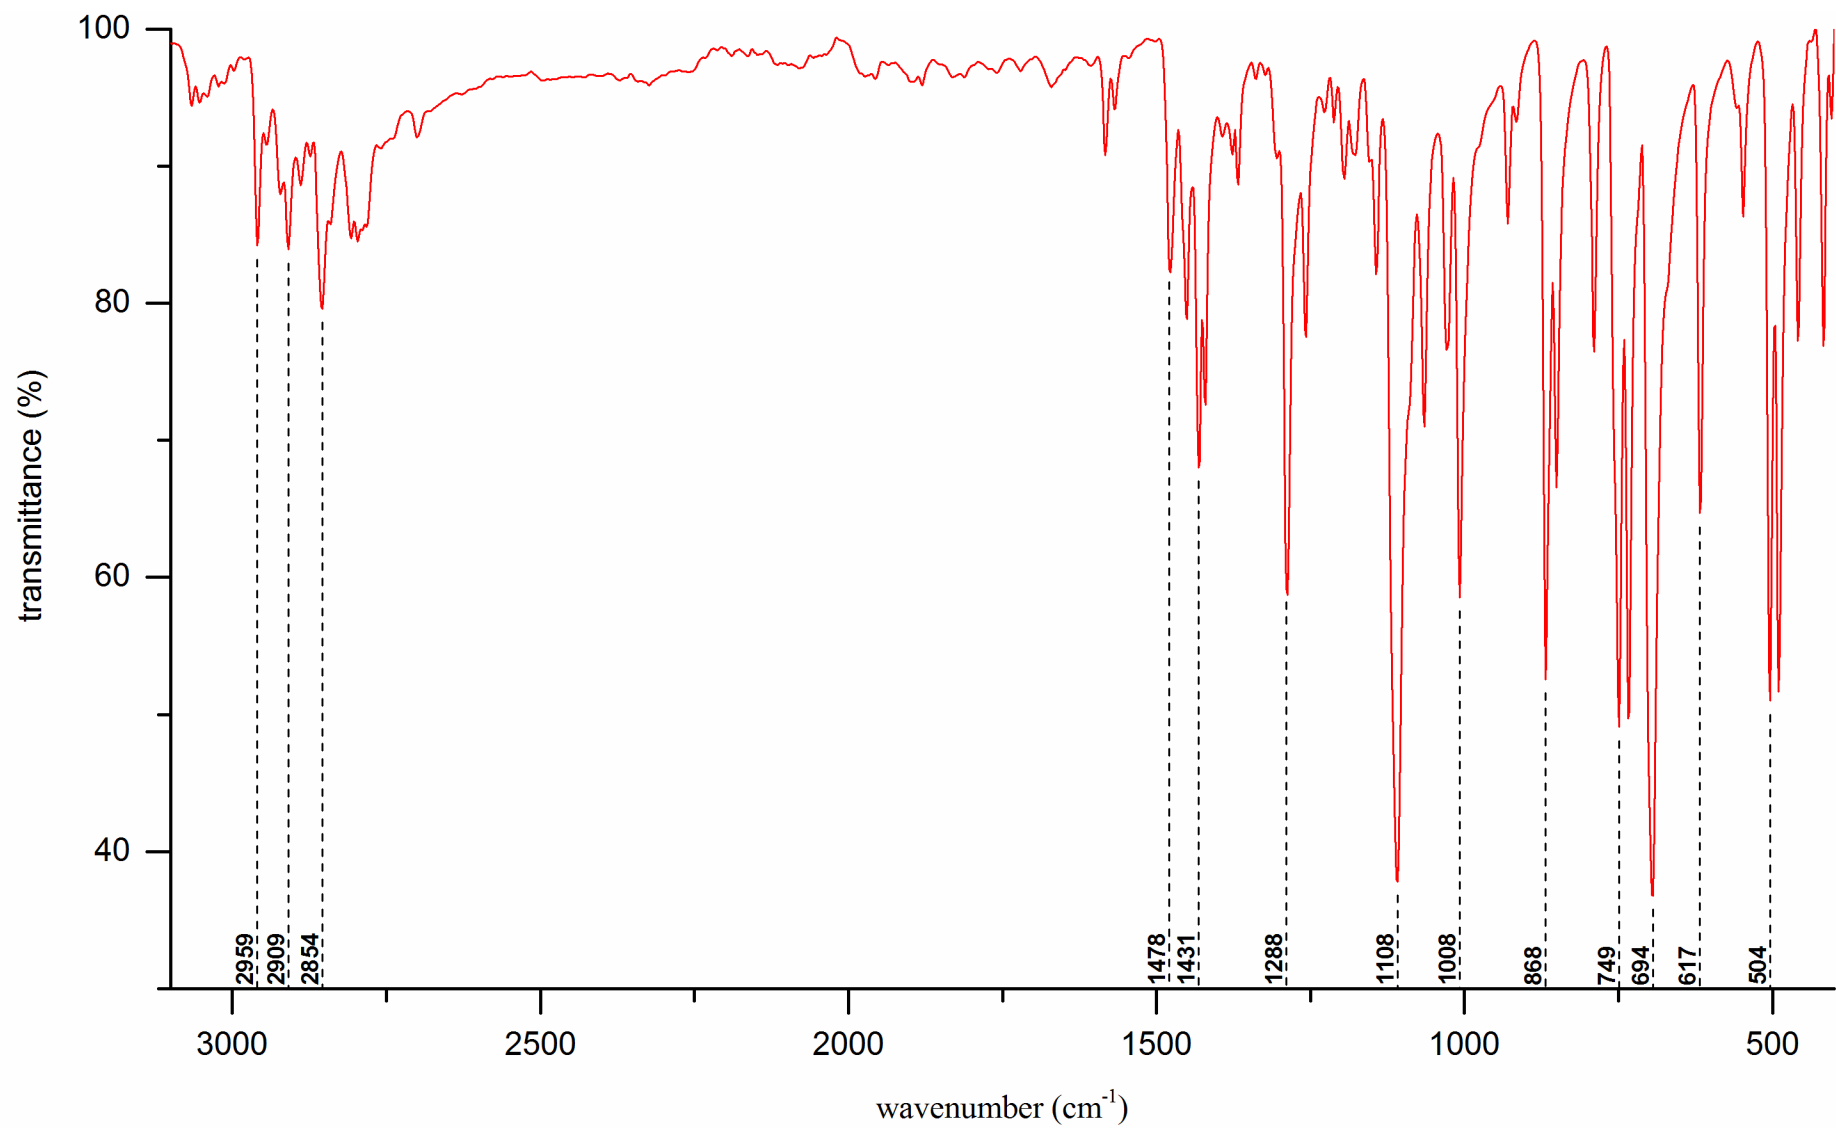

**Fig. S6** Infrared spectrum of  $\text{PPh}_2\{\text{CH}_2\text{N}(\text{CH}_2\text{CH}_2)_2\text{O}\}$  (2).

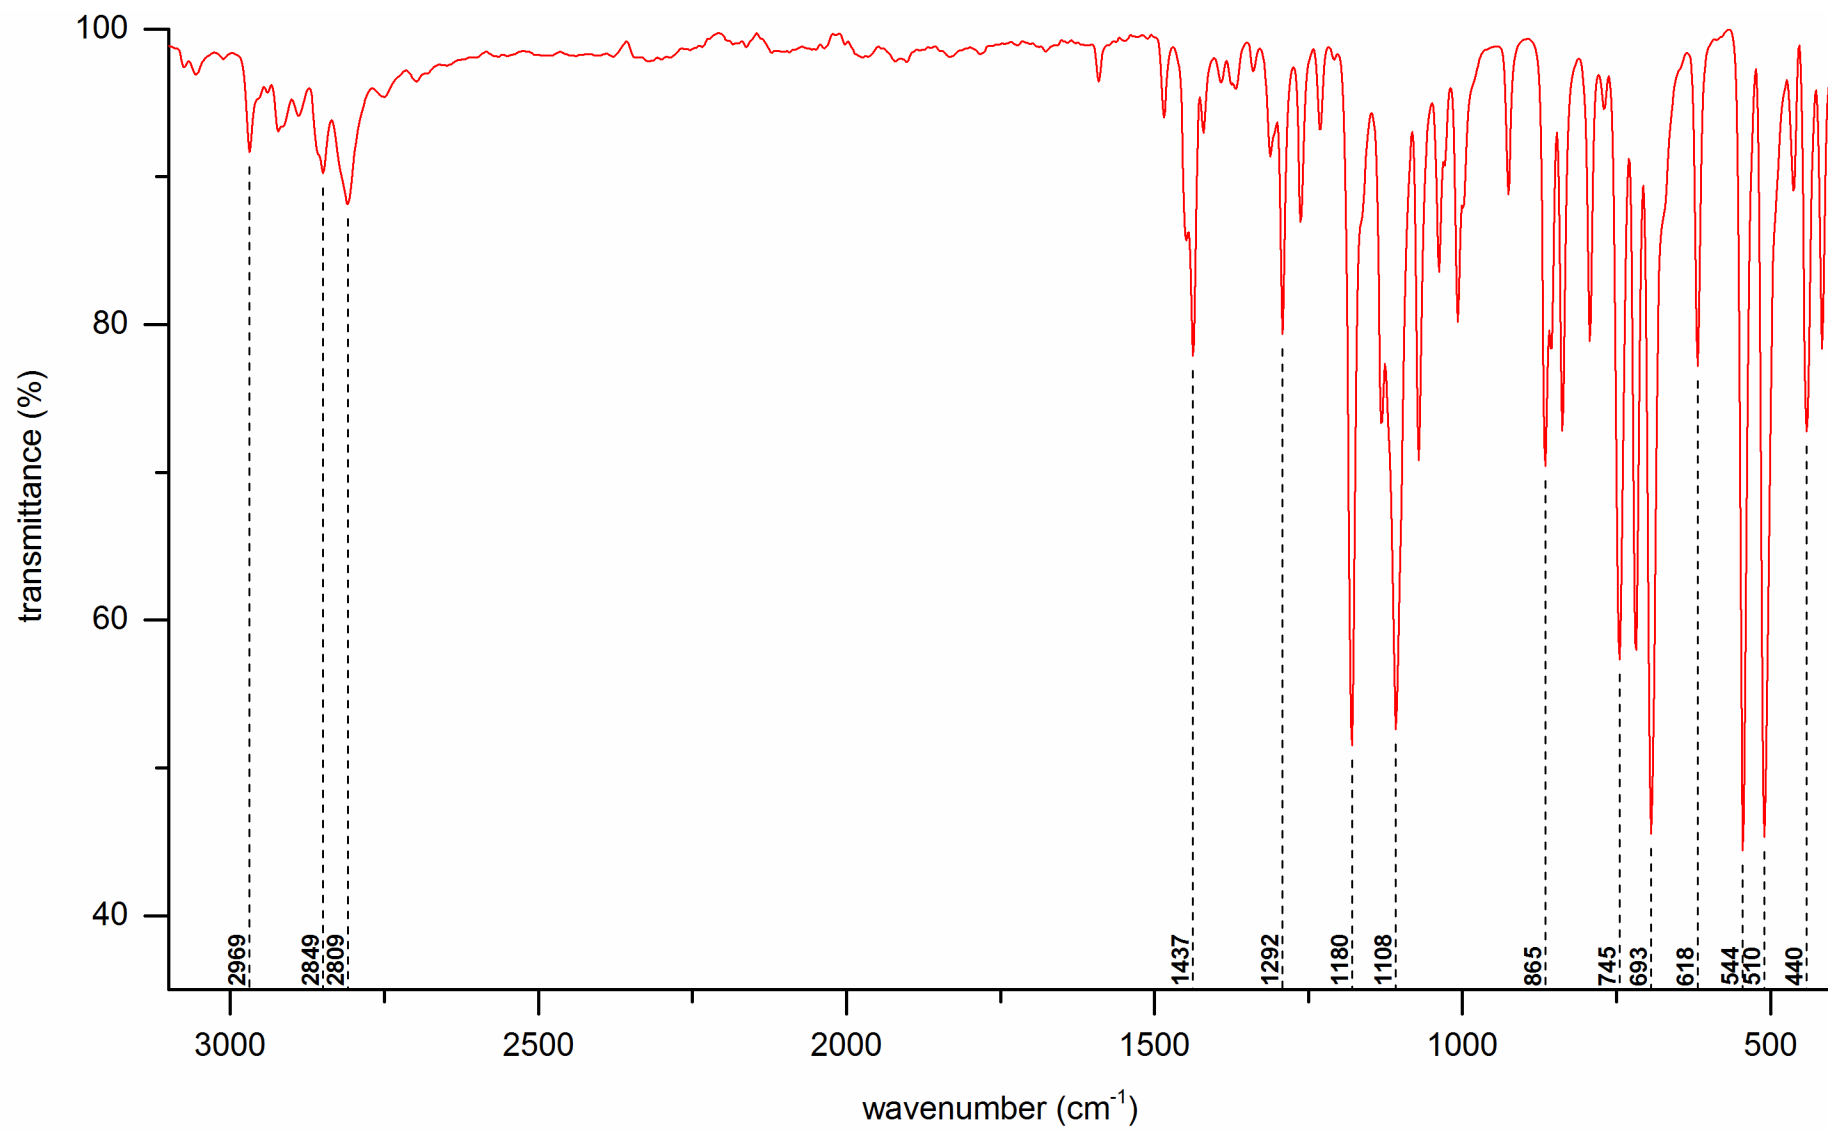

**Fig. S7** Infrared spectrum of  $\text{OPPh}_2\{\text{CH}_2\text{N}(\text{CH}_2\text{CH}_2)_2\text{O}\}$  (**20**).

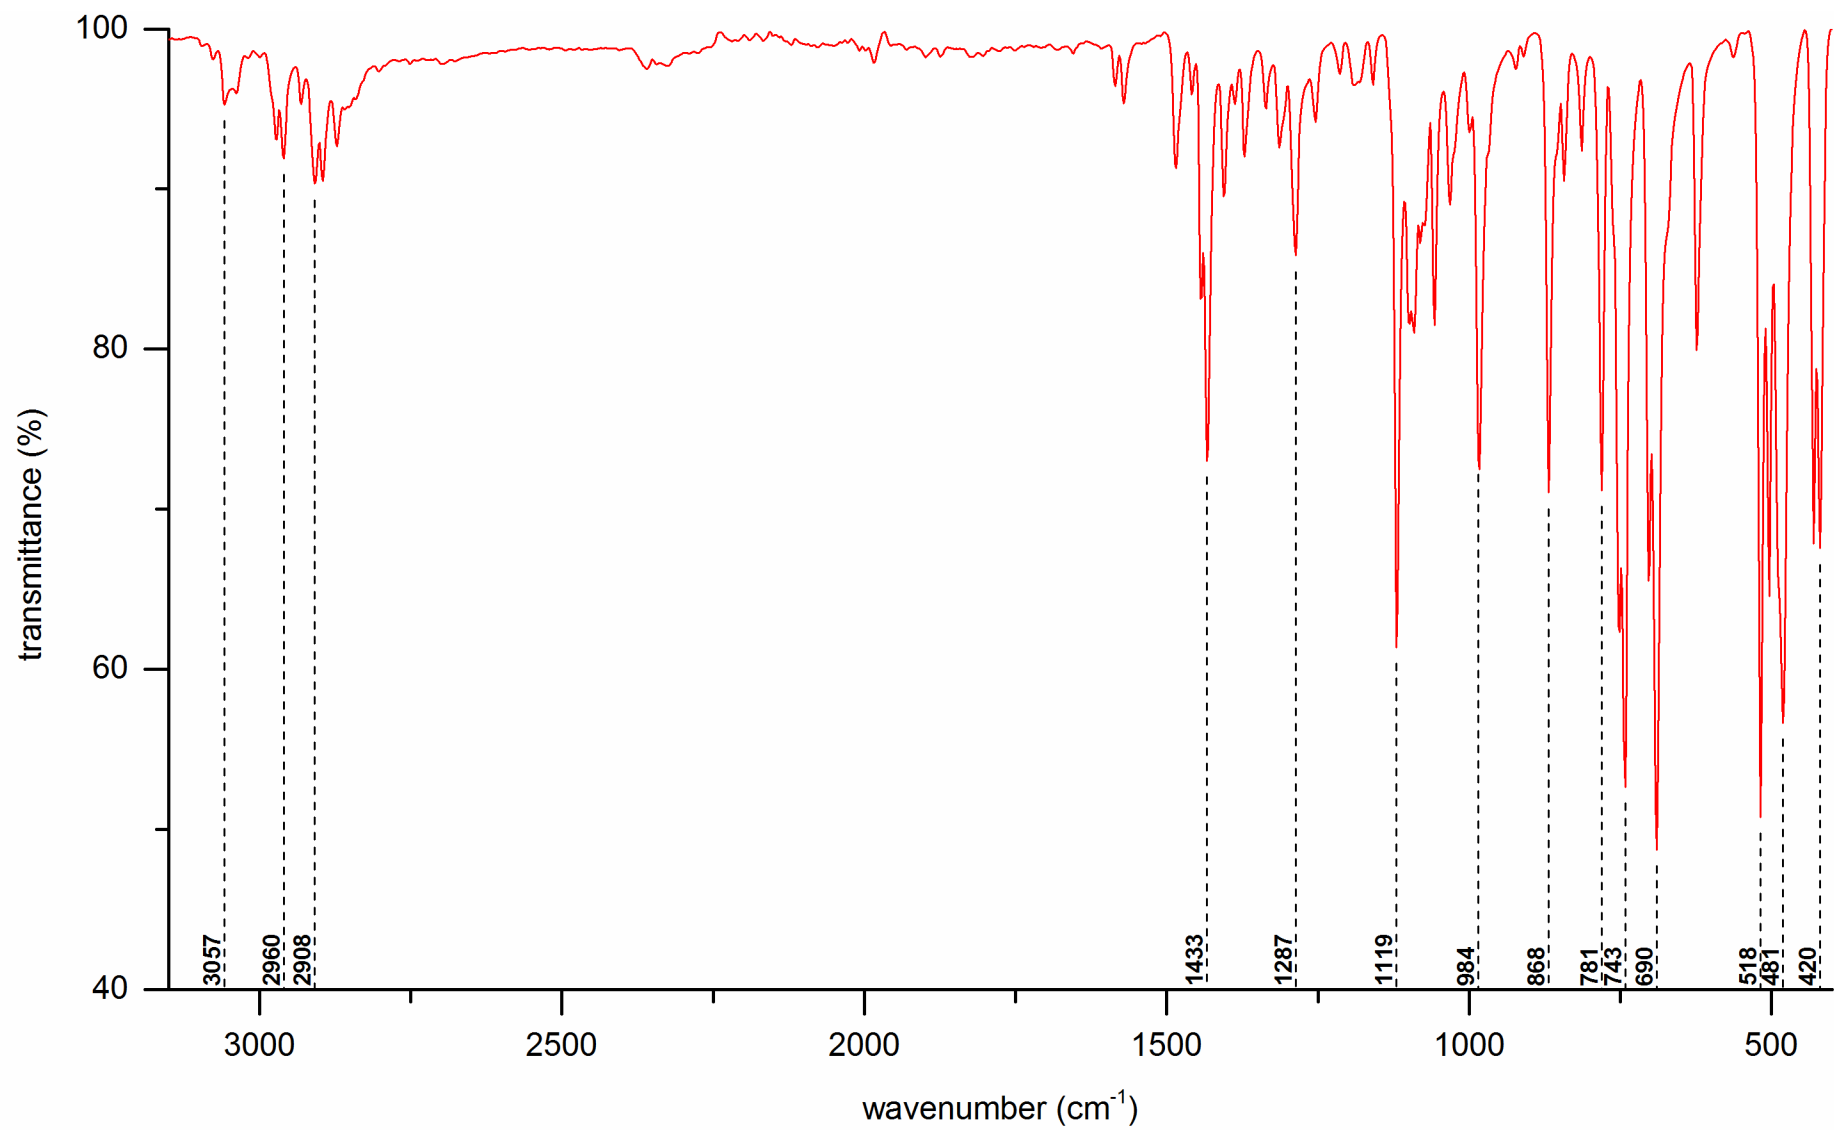

**Fig. S8** Infrared spectrum of [RuCl<sub>2</sub>(PPh<sub>2</sub>{CH<sub>2</sub>N(CH<sub>2</sub>CH<sub>2</sub>)<sub>2</sub>O})<sub>2</sub>] (**2A**).



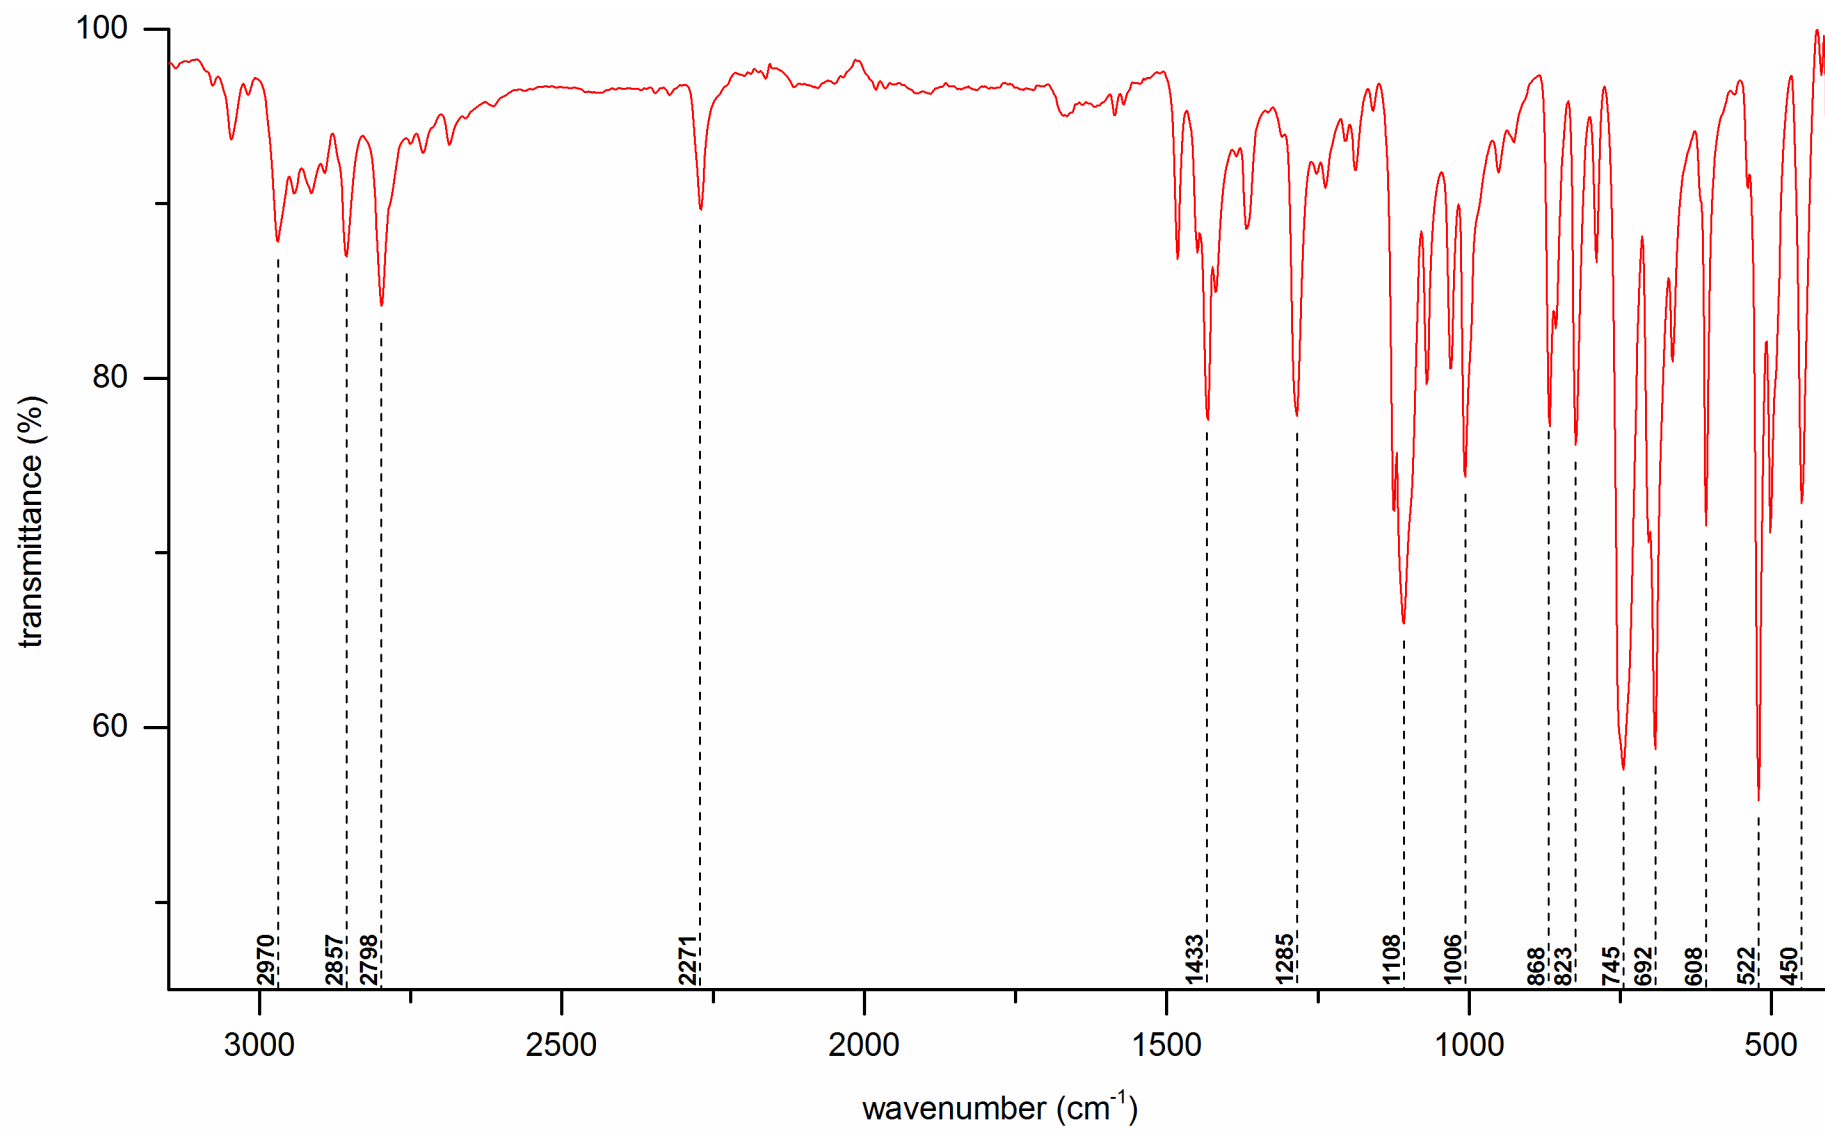

**Fig. S9** Infrared spectrum of  $[\text{RuCl}_2(\text{PPh}_2\{\text{CH}_2\text{N}(\text{CH}_2\text{CH}_2)_2\text{O}\})_2](\text{CH}_3\text{CN})_2$  (**2B**).

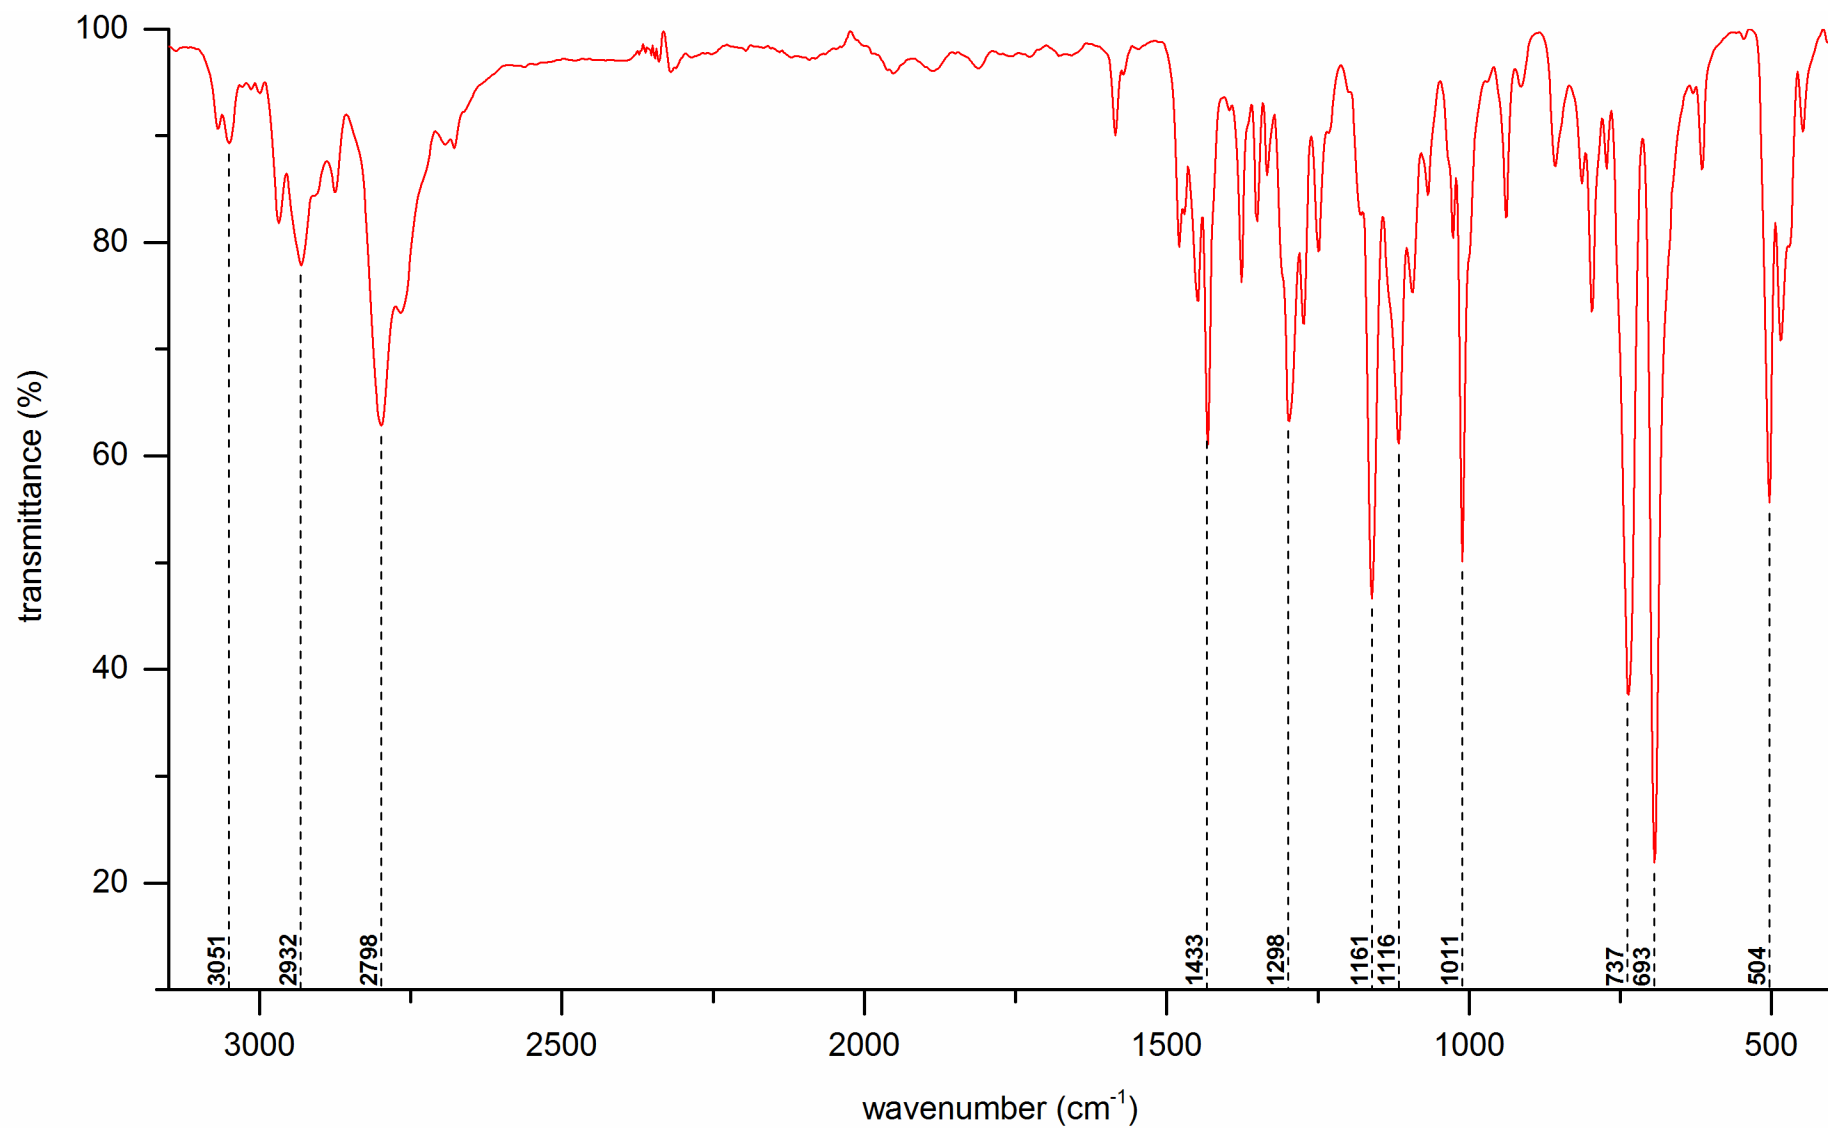

**Fig. S10** Infrared spectrum of  $\text{PPh}_2\{\text{CH}_2\text{N}(\text{CH}_2\text{CH}_2)_2\text{NCH}_2\text{CH}_3\}$  (**3**).

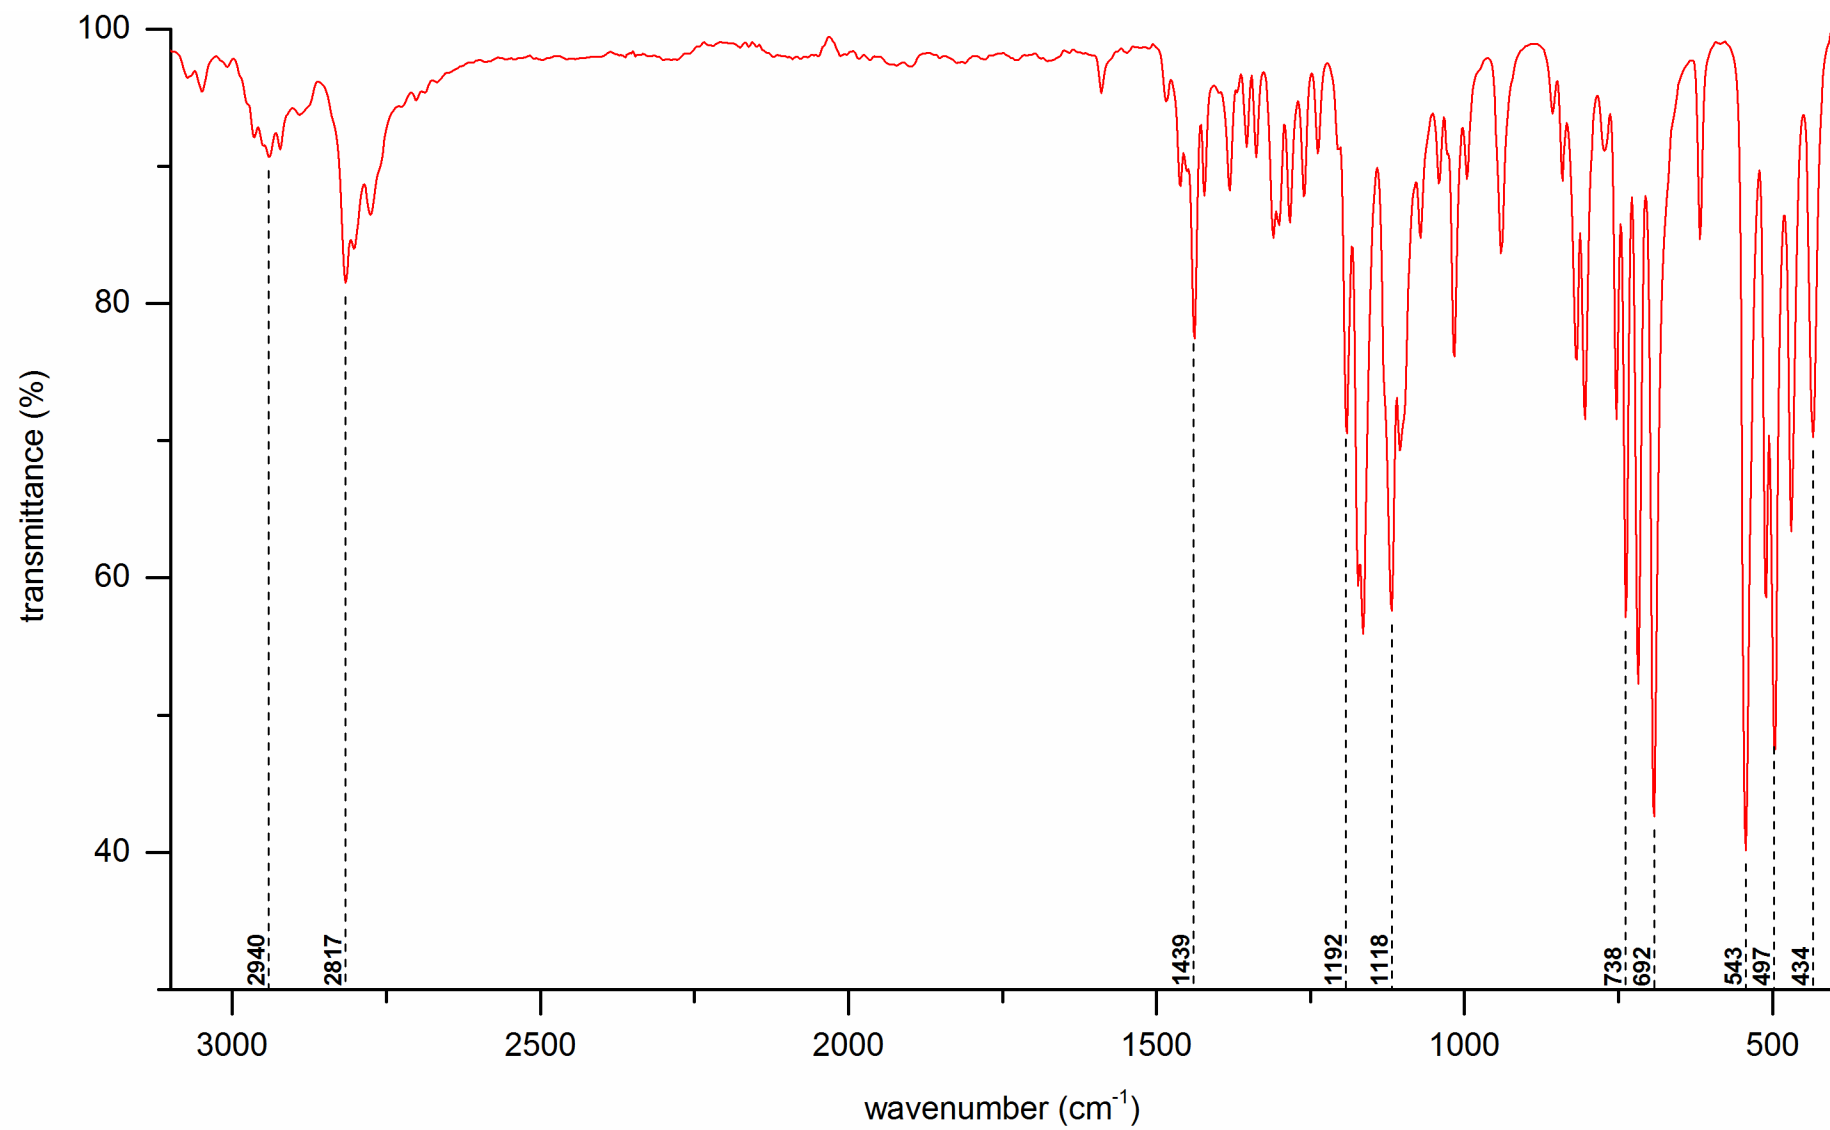

**Fig. S11** Infrared spectrum of  $\text{OPPh}_2\{\text{CH}_2\text{N}(\text{CH}_2\text{CH}_2)_2\text{NCH}_2\text{CH}_3\}$  (30).

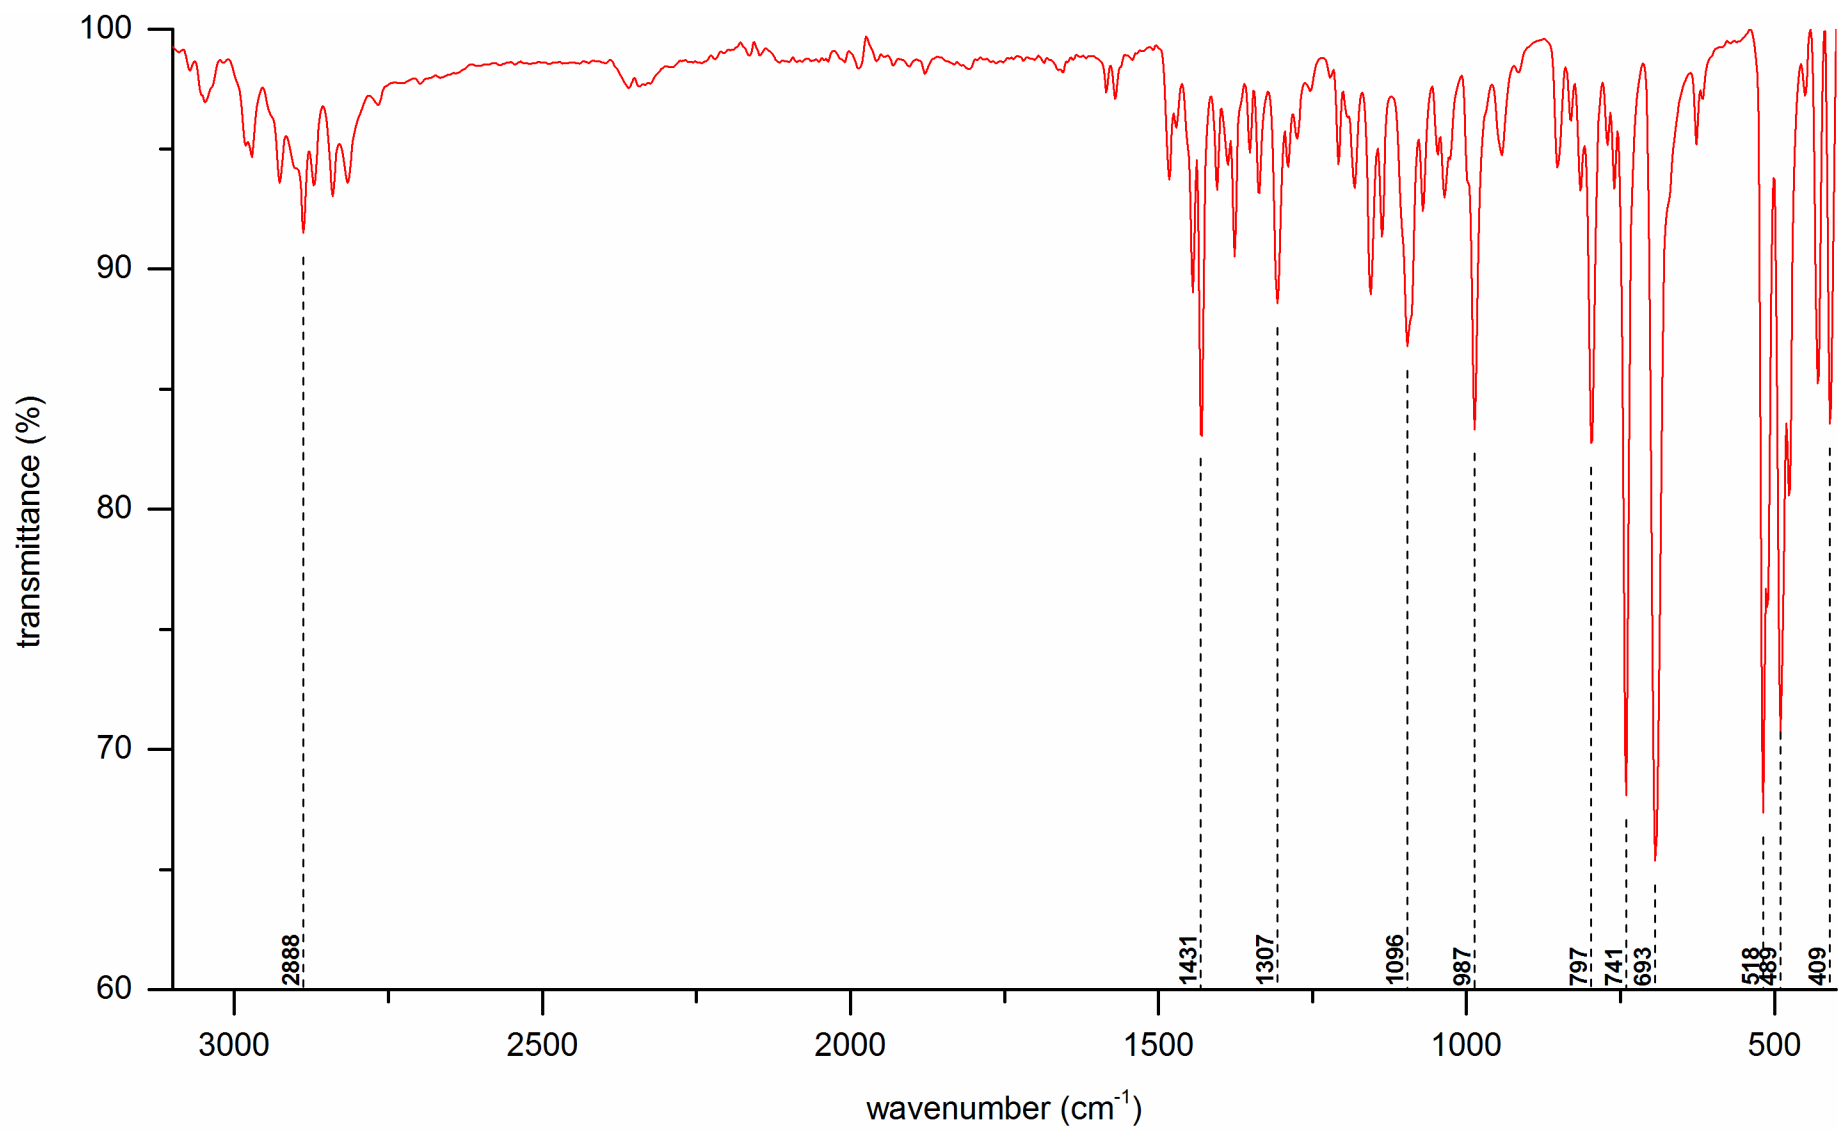

**Fig. S12** Infrared spectrum of [RuCl<sub>2</sub>(PPh<sub>2</sub>{CH<sub>2</sub>N(CH<sub>2</sub>CH<sub>2</sub>)<sub>2</sub>NCH<sub>2</sub>CH<sub>3</sub>})<sub>2</sub>] (**3A**).

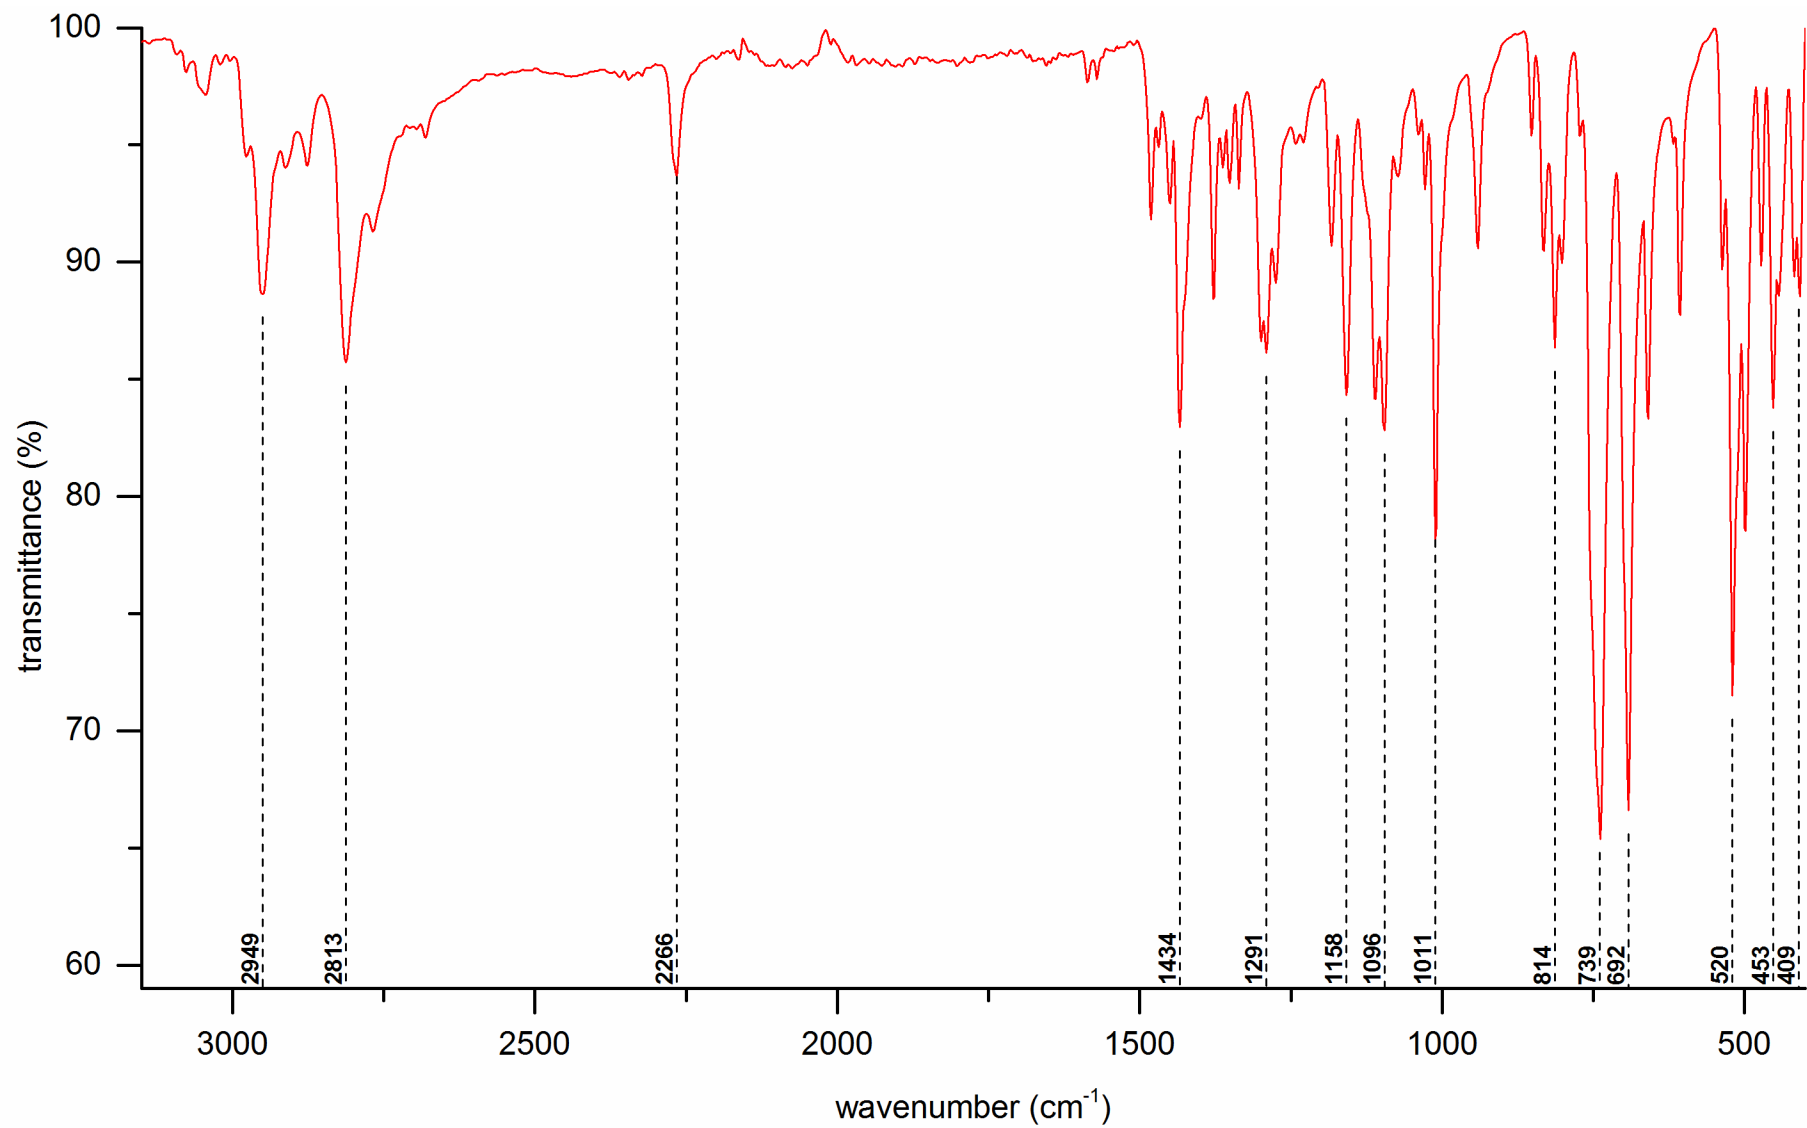

**Fig. S13** Infrared spectrum of [RuCl<sub>2</sub>(PPh<sub>2</sub>{CH<sub>2</sub>N(CH<sub>2</sub>CH<sub>2</sub>)<sub>2</sub>NCH<sub>2</sub>CH<sub>3</sub>})<sub>2</sub>(CH<sub>3</sub>CN)<sub>2</sub>] (**3B**).

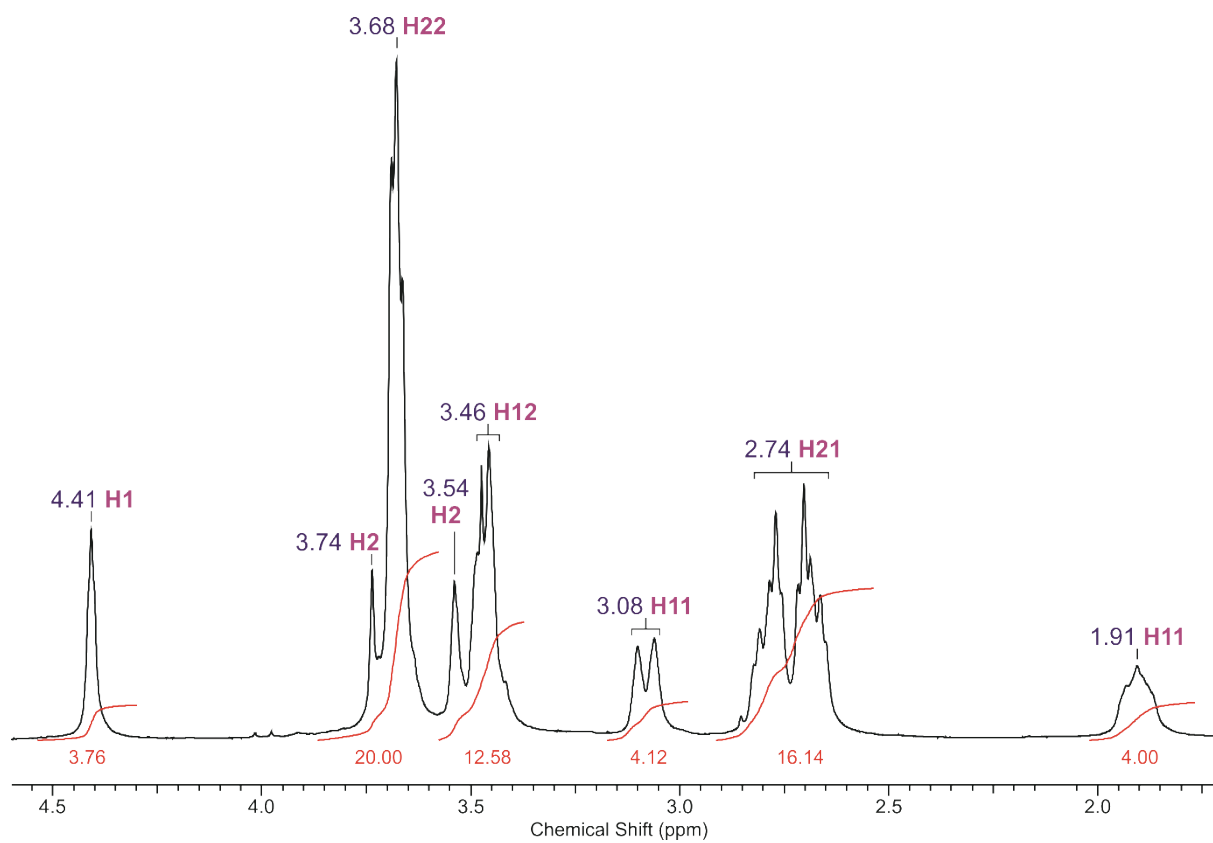

**Fig. S14**  $^1\text{H}$ NMR spectrum of  $[\text{RuCl}_2(\text{P}\{\text{CH}_2\text{N}(\text{CH}_2\text{CH}_2)_2\text{O}\}_3)_2]$  (**1A**).

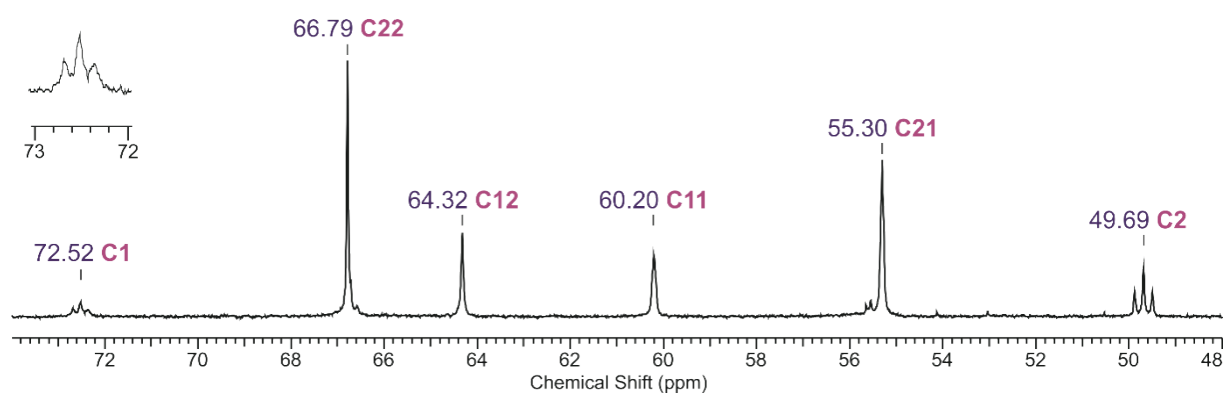

**Fig. S15**  $^{13}\text{C}$ NMR spectrum of  $[\text{RuCl}_2(\text{P}\{\text{CH}_2\text{N}(\text{CH}_2\text{CH}_2)_2\text{O}\}_3)_2]$  (**1A**).

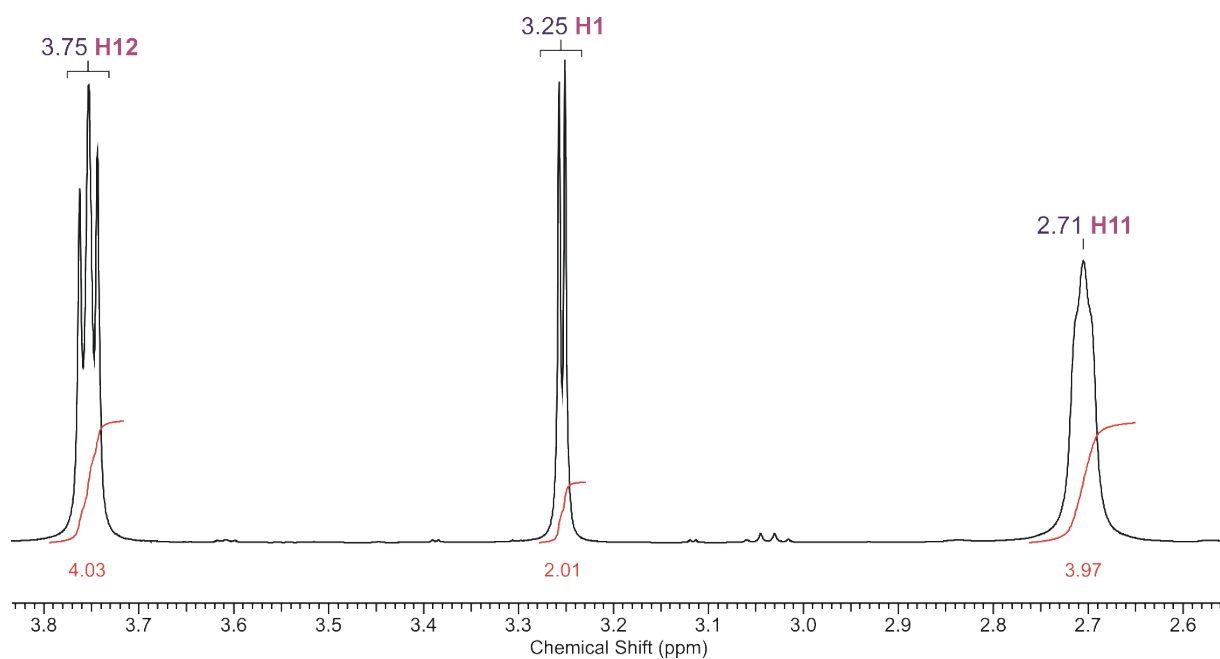

**Fig. S16** <sup>1</sup>H NMR spectrum of PPh<sub>2</sub>{CH<sub>2</sub>N(CH<sub>2</sub>CH<sub>2</sub>)<sub>2</sub>O} (2) (aliphatic region).

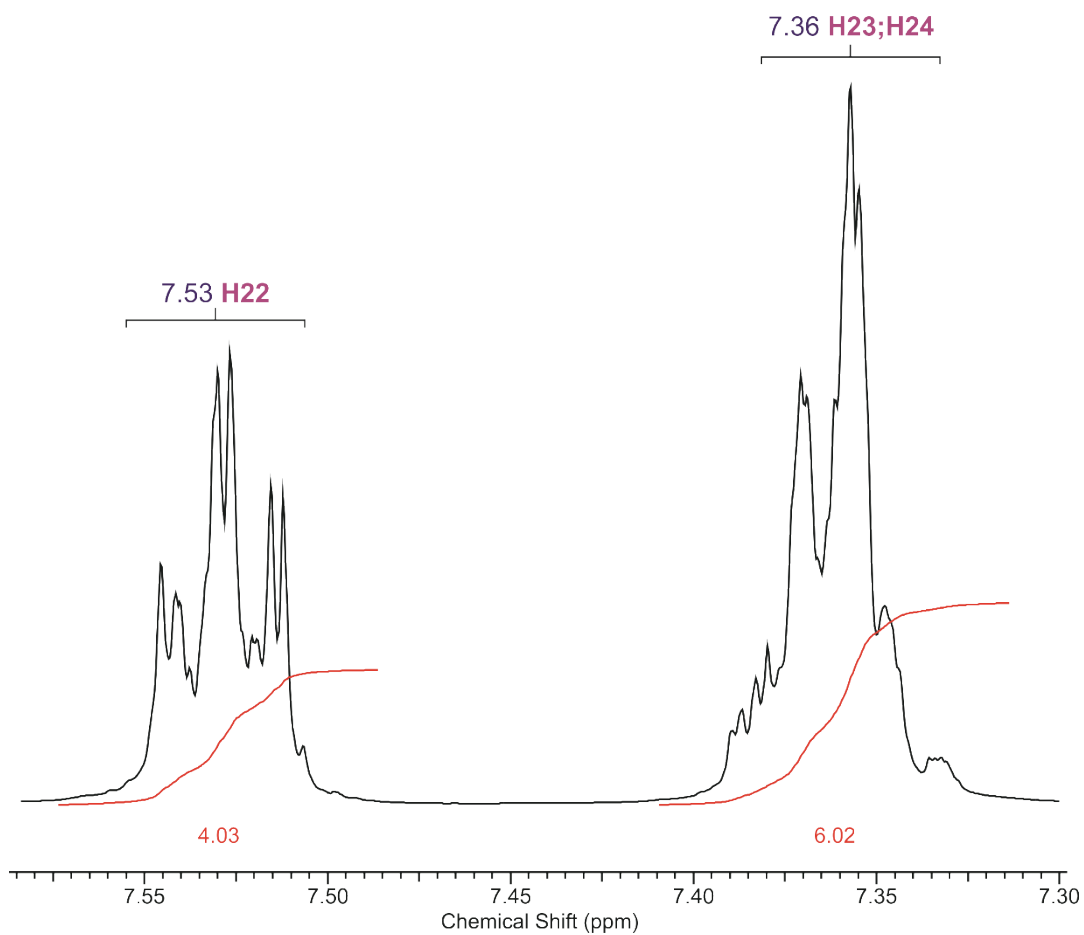

**Fig. S17** <sup>1</sup>H NMR spectrum of PPh<sub>2</sub>{CH<sub>2</sub>N(CH<sub>2</sub>CH<sub>2</sub>)<sub>2</sub>O} (2) (aromatic region).

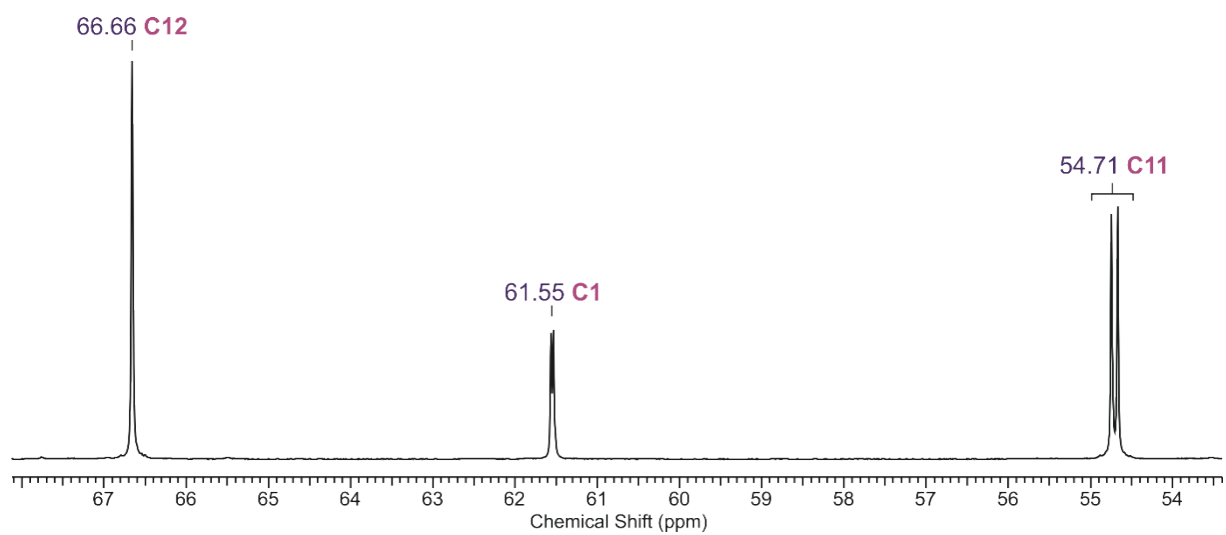

**Fig. S18** <sup>13</sup>C NMR spectrum of PPh<sub>2</sub>{CH<sub>2</sub>N(CH<sub>2</sub>CH<sub>2</sub>)<sub>2</sub>O} (**2**) (aliphatic region).

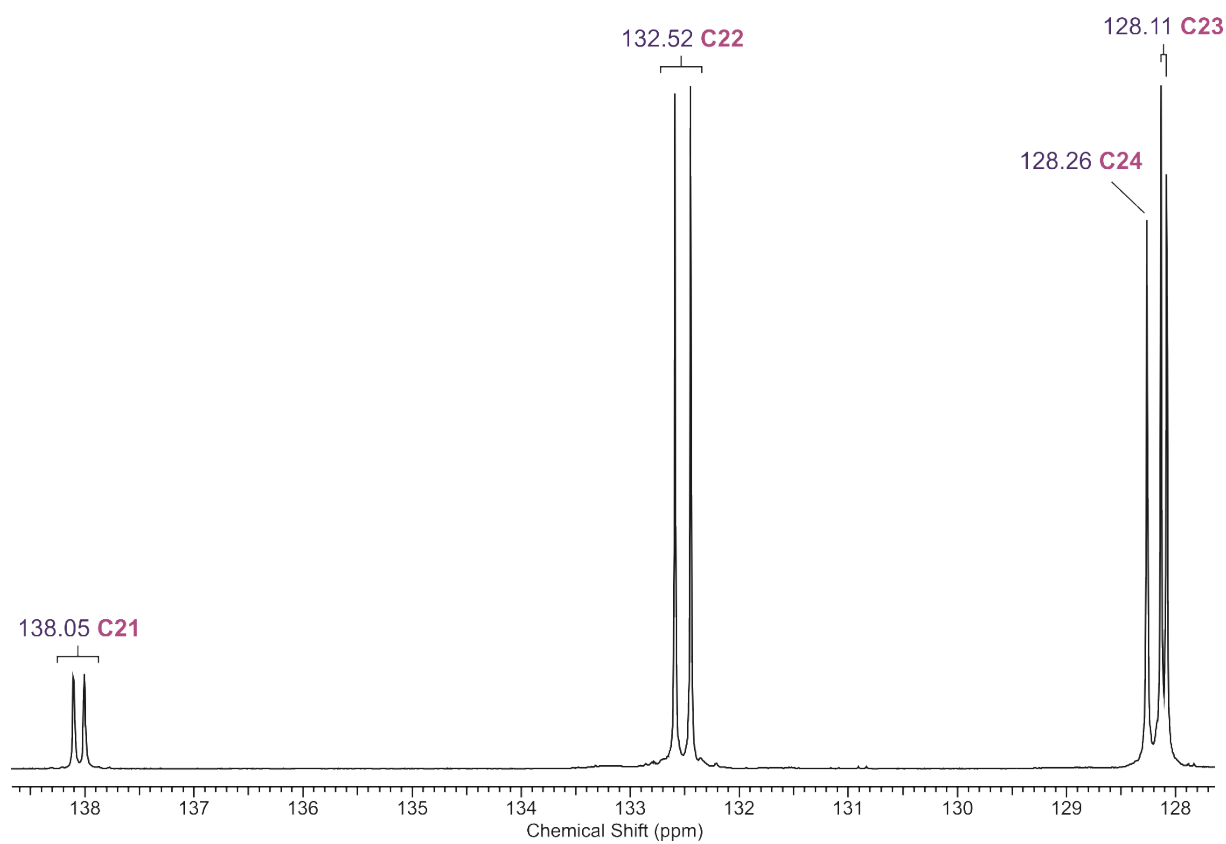

**Fig. S19** <sup>13</sup>C NMR spectrum of PPh<sub>2</sub>{CH<sub>2</sub>N(CH<sub>2</sub>CH<sub>2</sub>)<sub>2</sub>O} (**2**) (aromatic region).



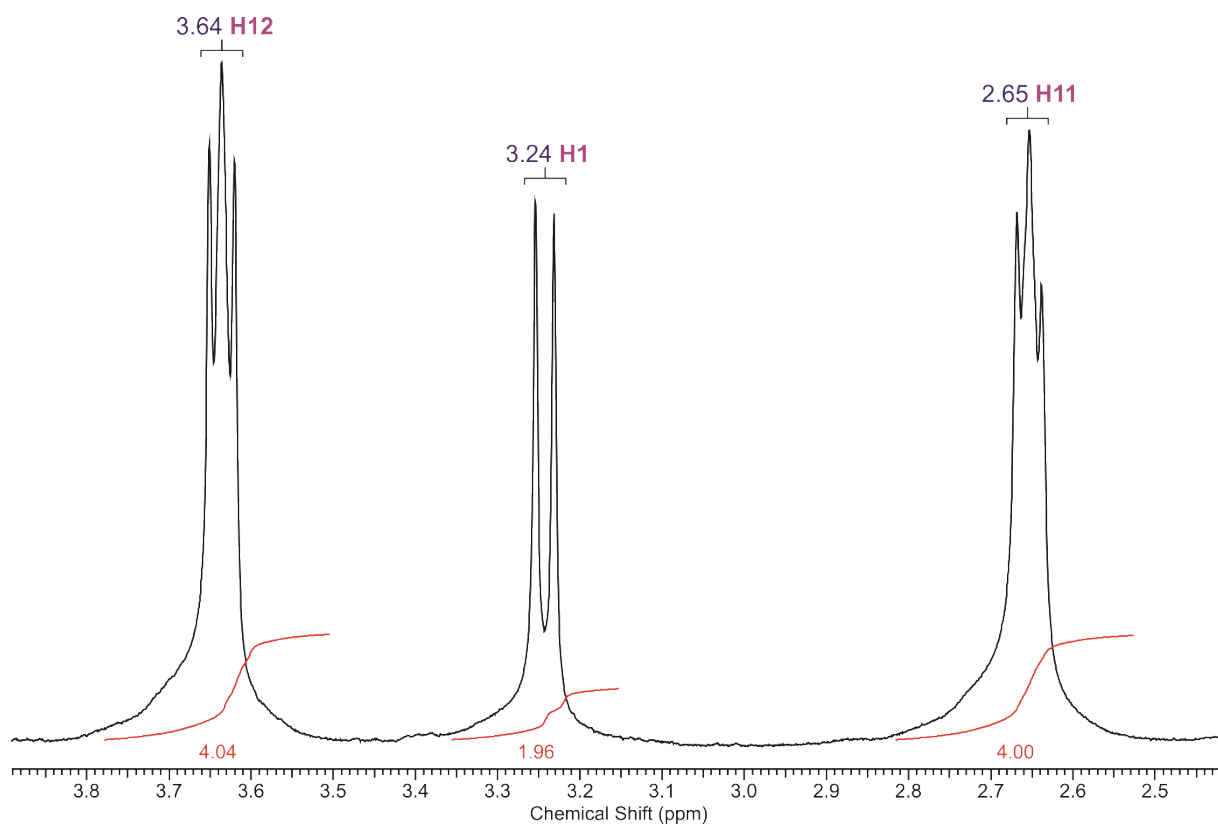

**Fig. S20** <sup>1</sup>H NMR spectrum of OPPh<sub>2</sub>{CH<sub>2</sub>N(CH<sub>2</sub>CH<sub>2</sub>)<sub>2</sub>O} (20) (aliphatic region).

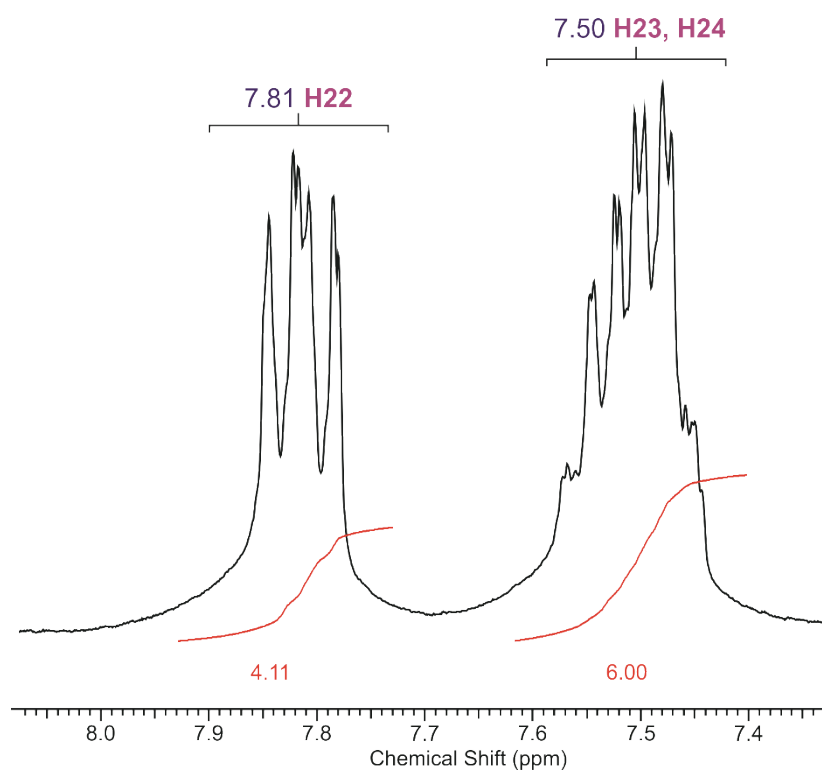

**Fig. S21** <sup>1</sup>H NMR spectrum of OPPh<sub>2</sub>{CH<sub>2</sub>N(CH<sub>2</sub>CH<sub>2</sub>)<sub>2</sub>O} (20) (aromatic region).

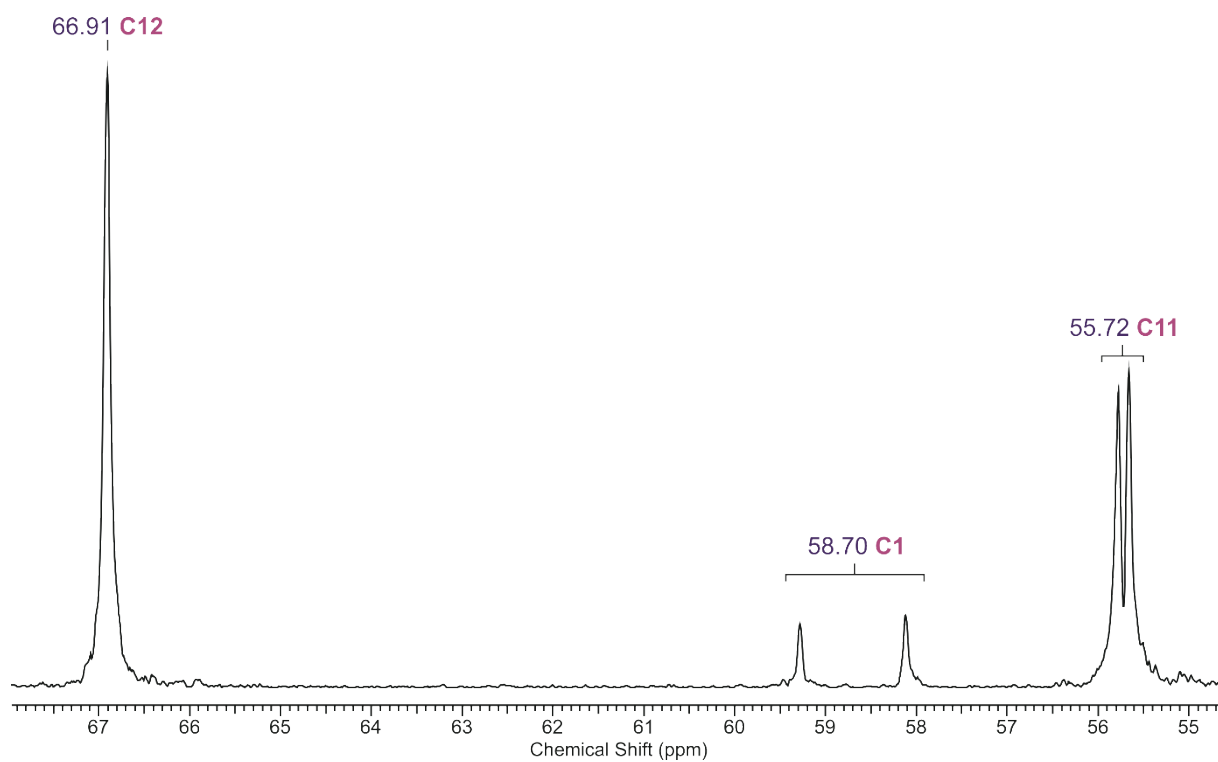

**Fig. S22** <sup>13</sup>CNMR spectrum of OPPh<sub>2</sub>{CH<sub>2</sub>N(CH<sub>2</sub>CH<sub>2</sub>)<sub>2</sub>O} (**20**) (aliphatic region).

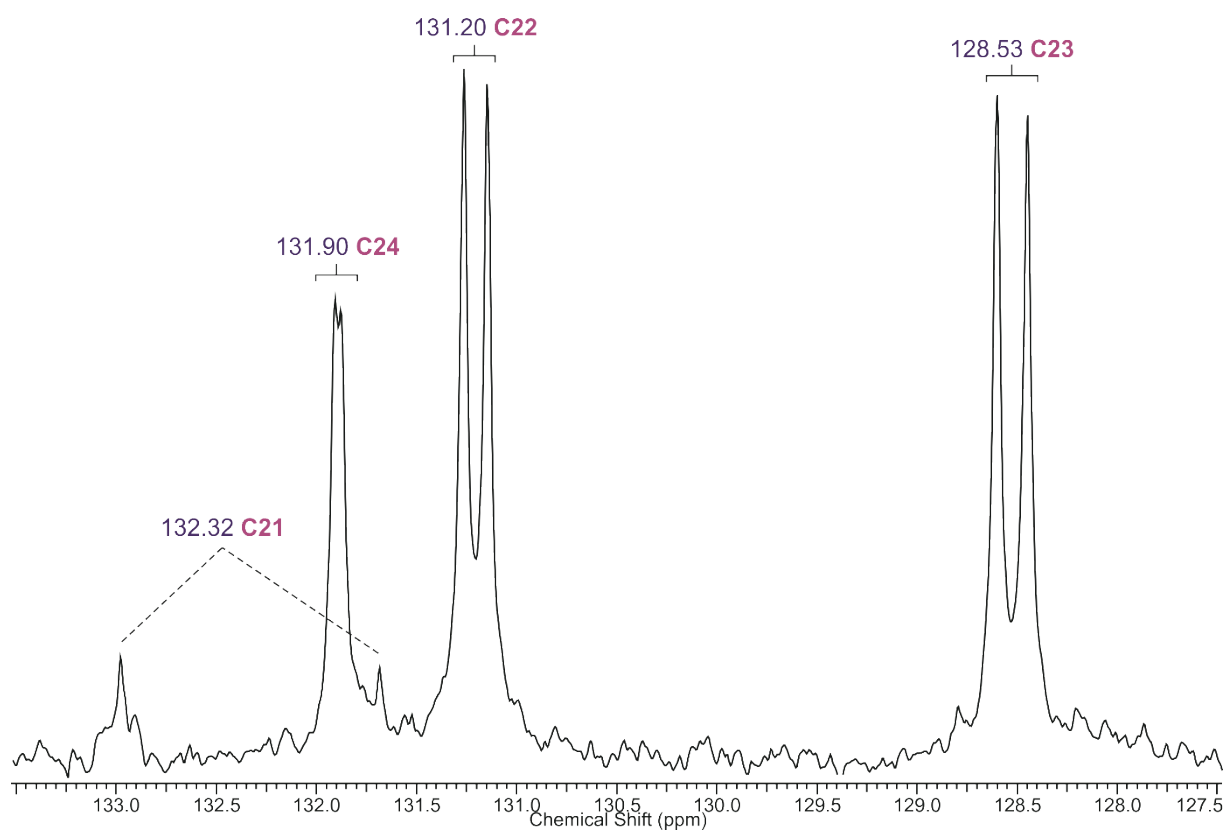

**Fig. S23** <sup>13</sup>CNMR spectrum of OPPh<sub>2</sub>{CH<sub>2</sub>N(CH<sub>2</sub>CH<sub>2</sub>)<sub>2</sub>O} (**20**) (aromatic region).

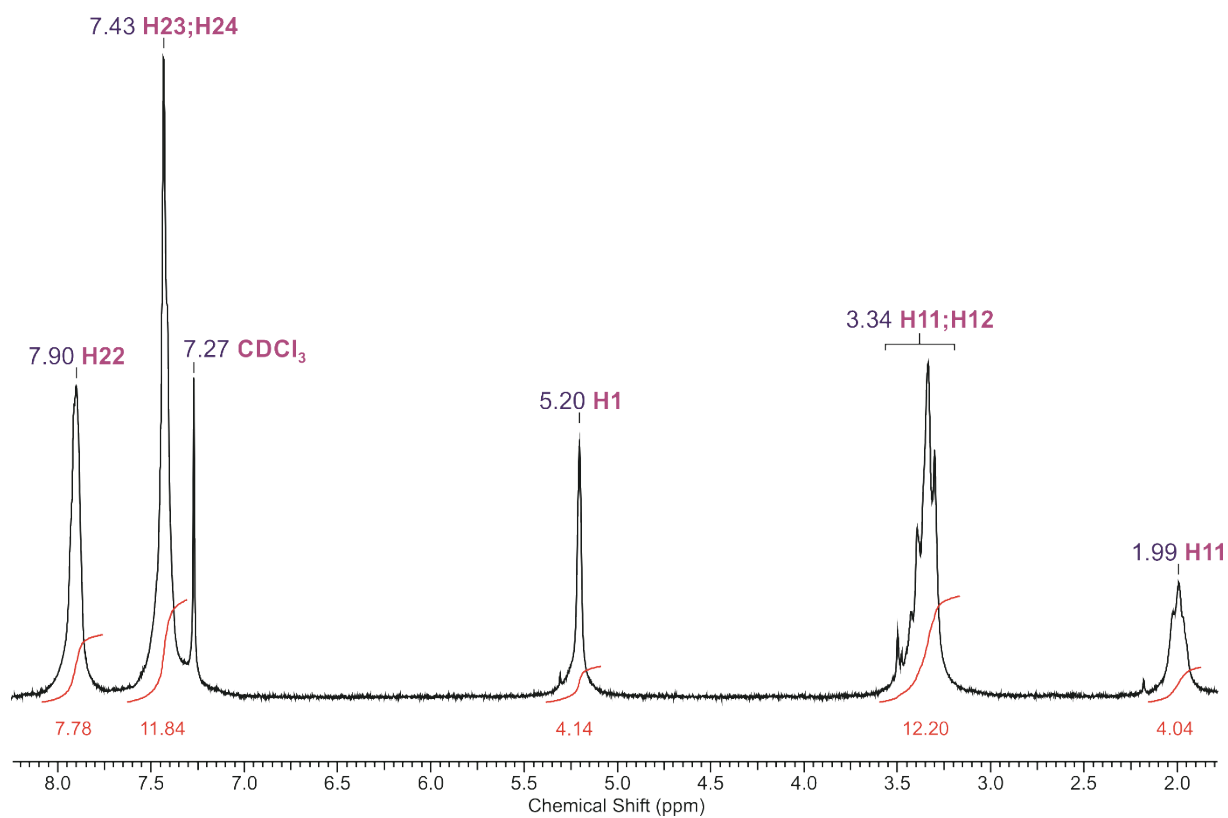

**Fig. S24** <sup>1</sup>H NMR spectrum of  $[\text{RuCl}_2(\text{PPh}_2\{\text{CH}_2\text{N}(\text{CH}_2\text{CH}_2)_2\text{O}\})_2]$  (**2A**).

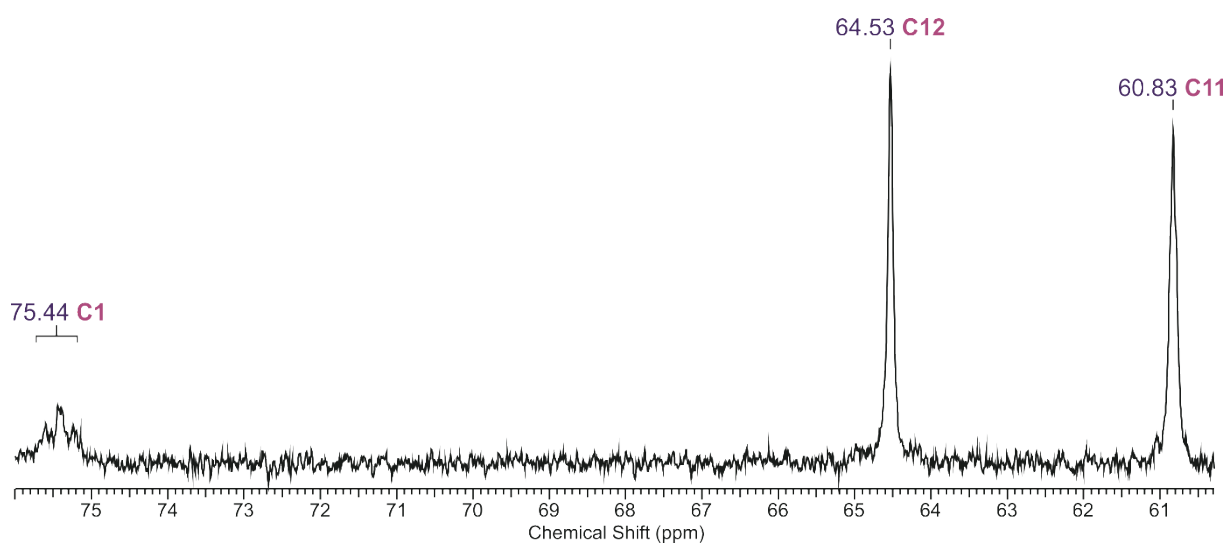

**Fig. S25** <sup>13</sup>C NMR spectrum of  $[\text{RuCl}_2(\text{PPh}_2\{\text{CH}_2\text{N}(\text{CH}_2\text{CH}_2)_2\text{O}\})_2]$  (**2A**) (aliphatic region).

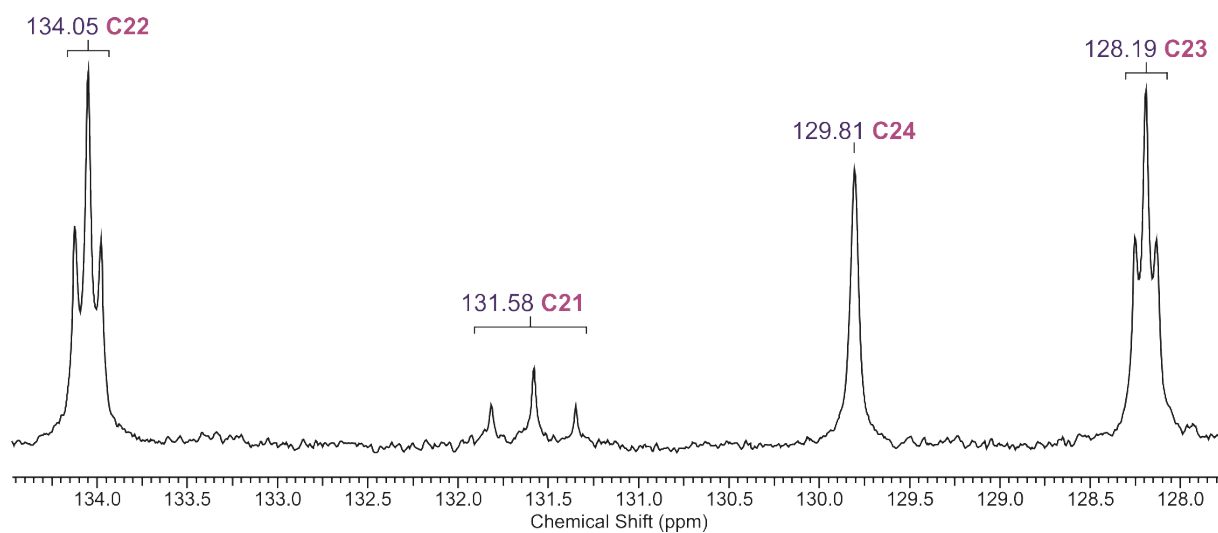

**Fig. S26**  $^{13}\text{C}$ NMR spectrum of  $[\text{RuCl}_2(\text{PPh}_2\{\text{CH}_2\text{N}(\text{CH}_2\text{CH}_2)_2\text{O}\})_2]$  (**2A**) (aromatic region).

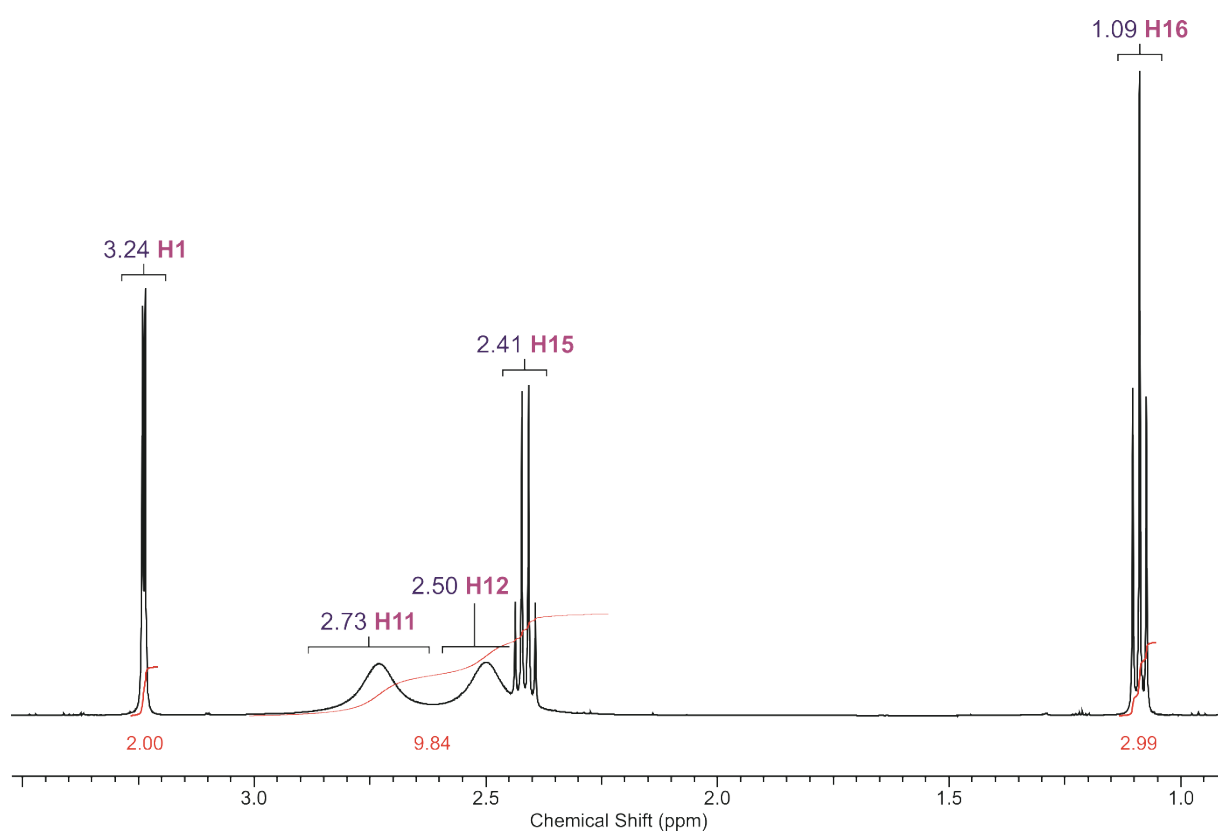

**Fig. S27**  $^1\text{H}$ NMR spectrum of  $\text{PPh}_2\{\text{CH}_2\text{N}(\text{CH}_2\text{CH}_2)_2\text{NCH}_2\text{CH}_3\}$  (**3**) (aliphatic region).

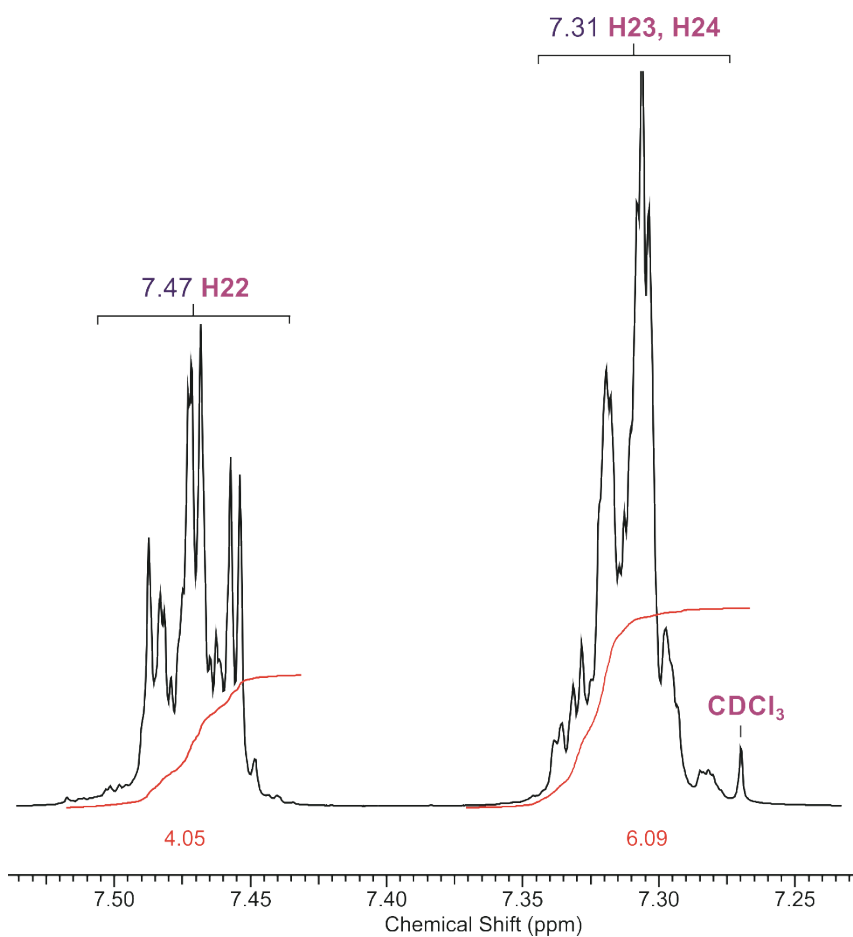

**Fig. S28**  $^1\text{H}$ NMR spectrum of  $\text{PPh}_2\{\text{CH}_2\text{N}(\text{CH}_2\text{CH}_2)_2\text{NCH}_2\text{CH}_3\}$  (**3**) (aromatic region).

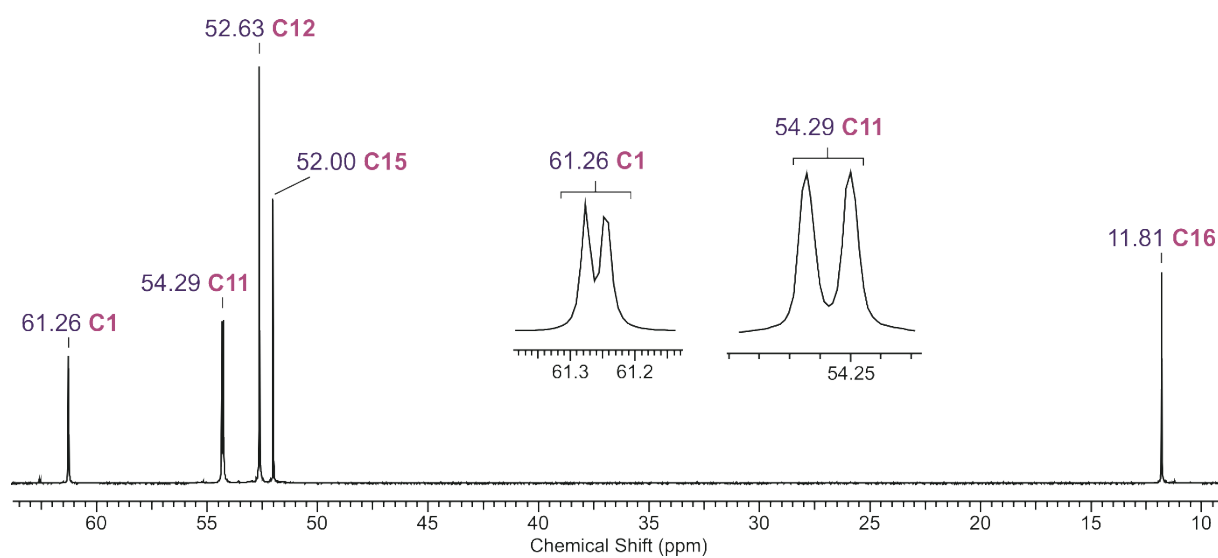

**Fig. S29**  $^{13}\text{C}$ NMR spectrum of  $\text{PPh}_2\{\text{CH}_2\text{N}(\text{CH}_2\text{CH}_2)_2\text{NCH}_2\text{CH}_3\}$  (**3**) (aliphatic region).

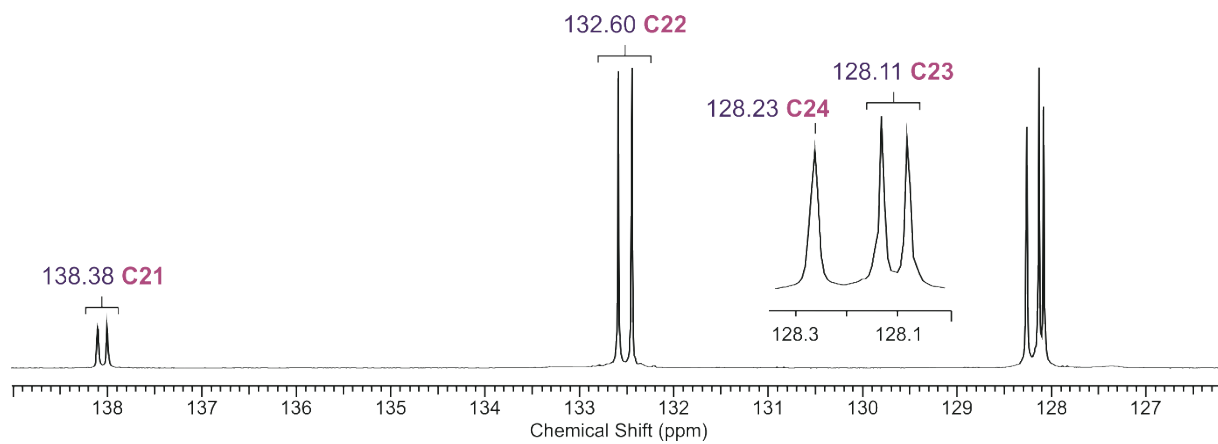

**Fig. S30**  $^{13}\text{C}$ NMR spectrum of  $\text{PPh}_2\{\text{CH}_2\text{N}(\text{CH}_2\text{CH}_2)_2\text{NCH}_2\text{CH}_3\}$  (**3**) (aromatic region).

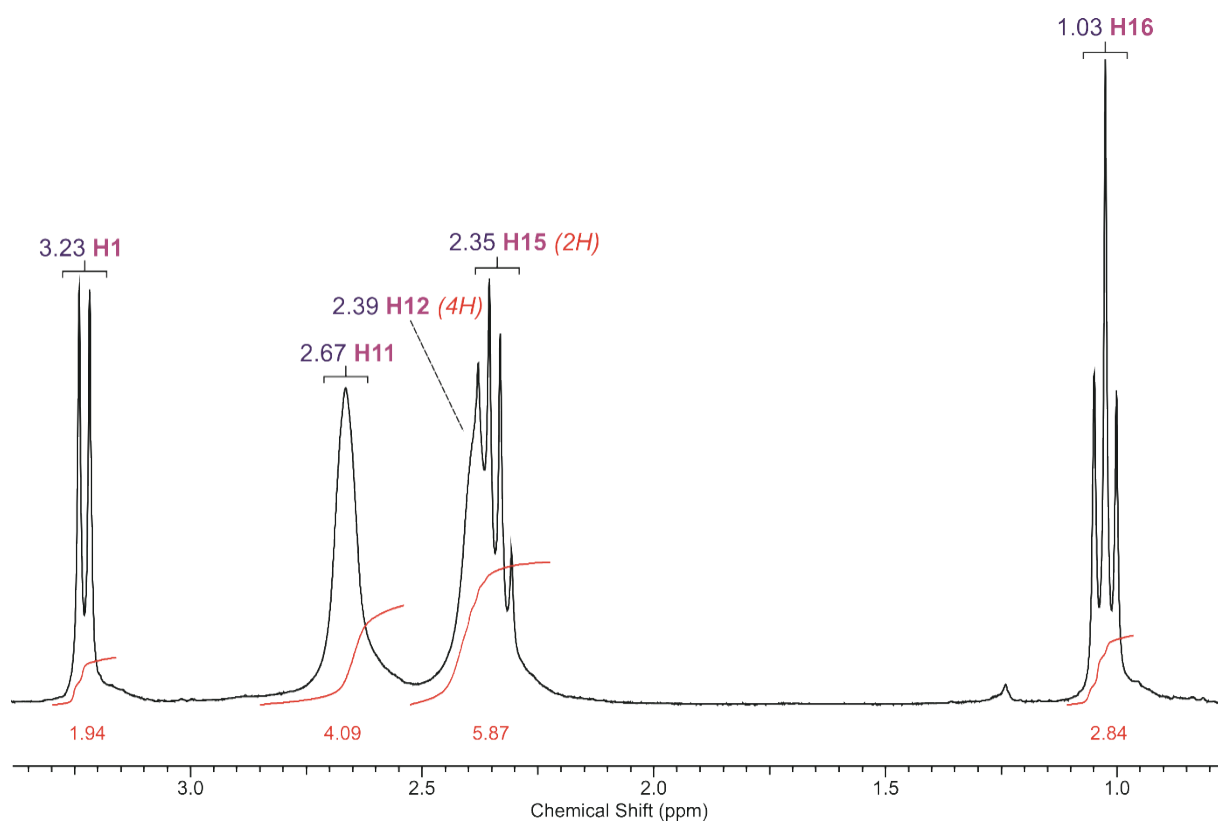

**Fig. S31**  $^1\text{H}$ NMR spectrum of  $\text{OPPh}_2\{\text{CH}_2\text{N}(\text{CH}_2\text{CH}_2)_2\text{NCH}_2\text{CH}_3\}$  (**30**) (aliphatic region).

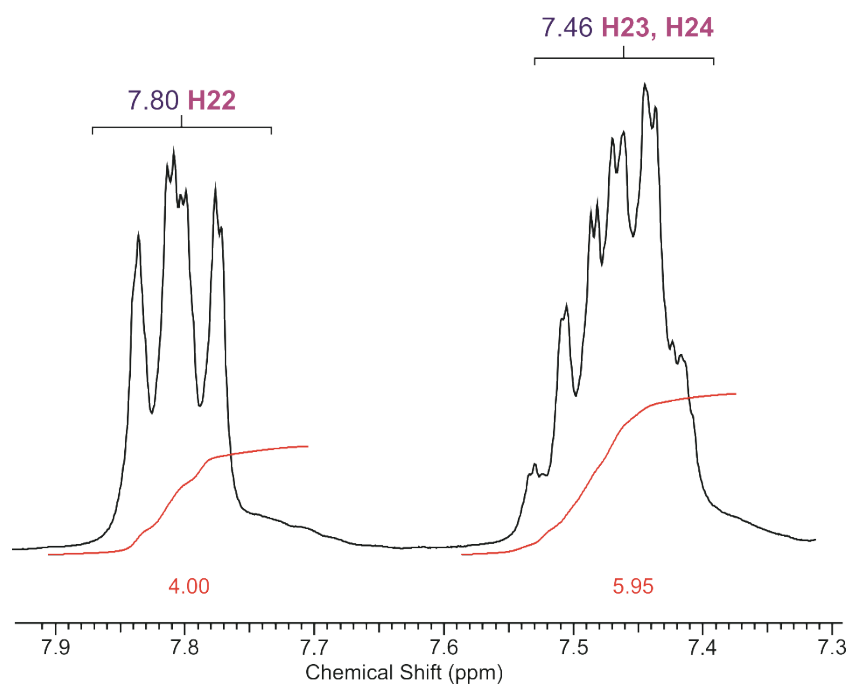

**Fig. S32** <sup>1</sup>H NMR spectrum of OPPh<sub>2</sub>{CH<sub>2</sub>N(CH<sub>2</sub>CH<sub>2</sub>)<sub>2</sub>NCH<sub>2</sub>CH<sub>3</sub>} (**30**) (aromatic region).

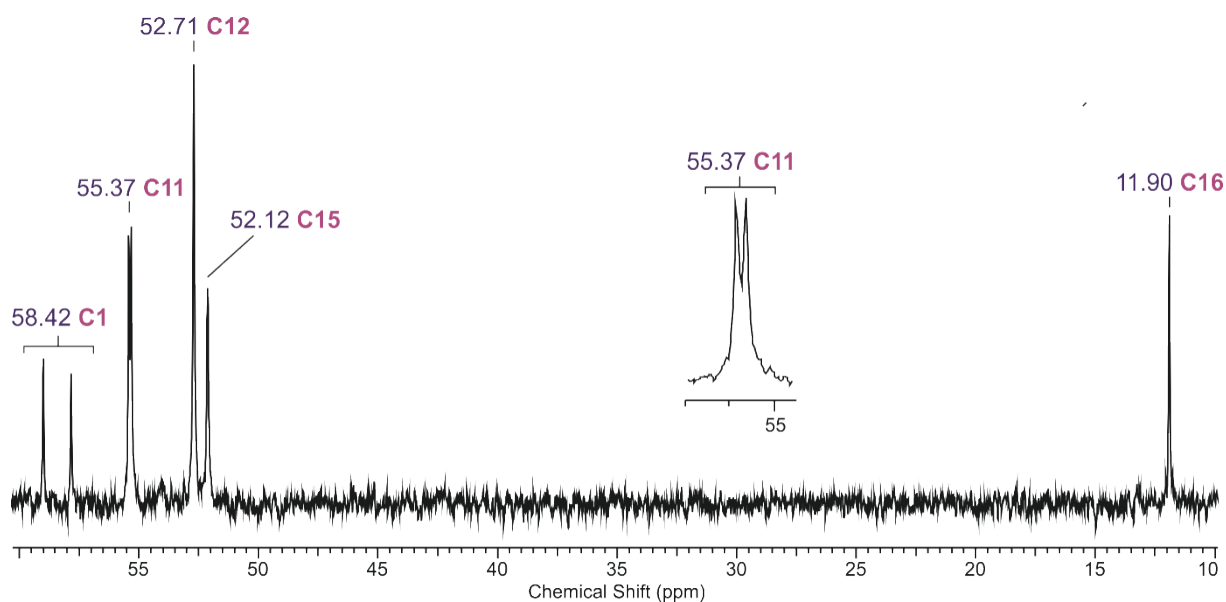

**Fig. S33** <sup>13</sup>C NMR spectrum of OPPh<sub>2</sub>{CH<sub>2</sub>N(CH<sub>2</sub>CH<sub>2</sub>)<sub>2</sub>NCH<sub>2</sub>CH<sub>3</sub>} (**30**) (aliphatic region).

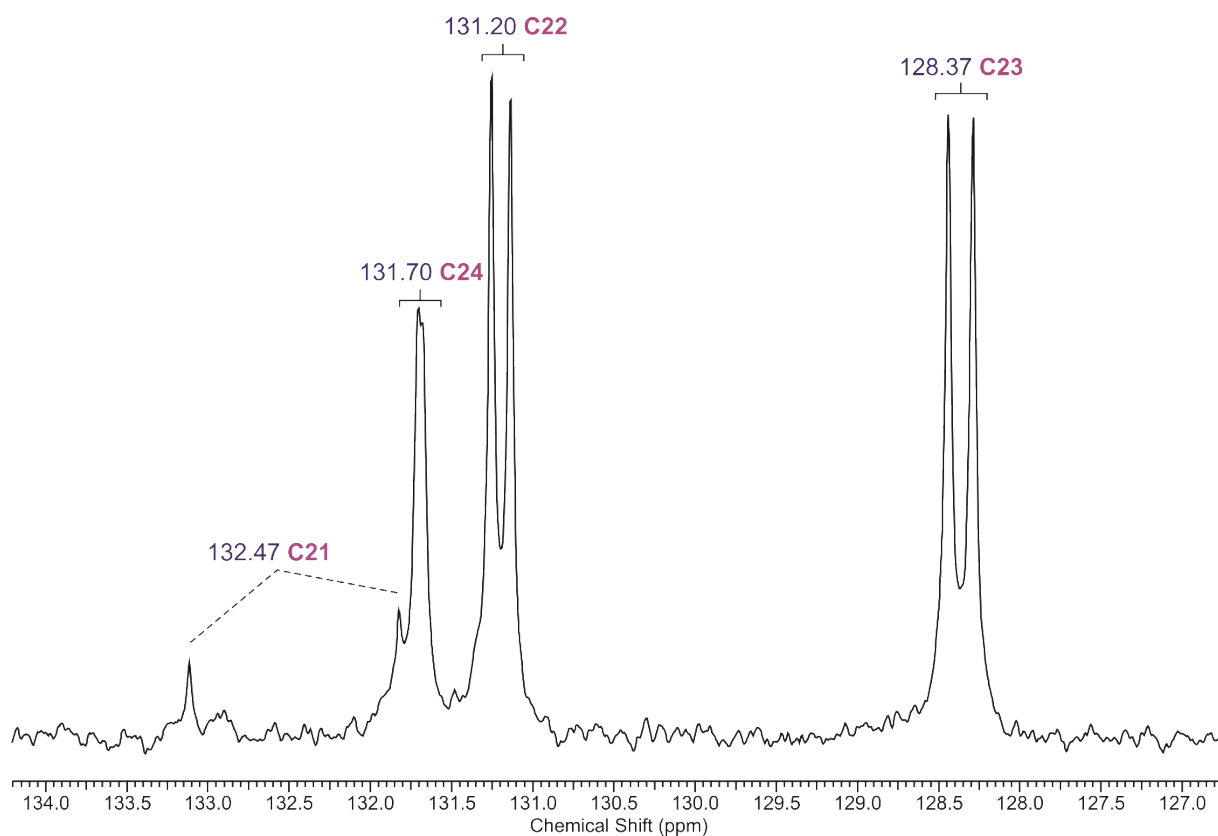

**Fig. S34**  $^{13}\text{C}$ NMR spectrum of  $\text{OPPh}_2\{\text{CH}_2\text{N}(\text{CH}_2\text{CH}_2)_2\text{NCH}_2\text{CH}_3\}$  (**30**) (aromatic region).

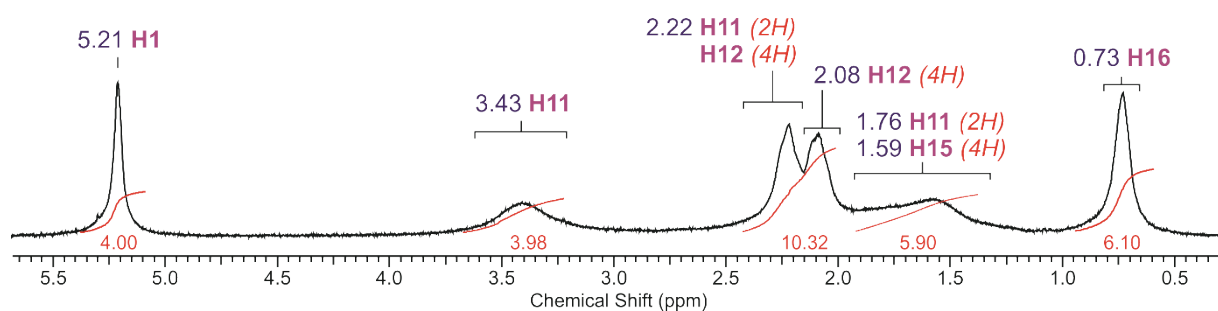

**Fig. S35**  $^1\text{H}$ NMR spectrum of  $[\text{RuCl}_2(\text{PPh}_2\{\text{CH}_2\text{N}(\text{CH}_2\text{CH}_2)_2\text{NCH}_2\text{CH}_3\})_2]$  (**3A**) (aliphatic region).



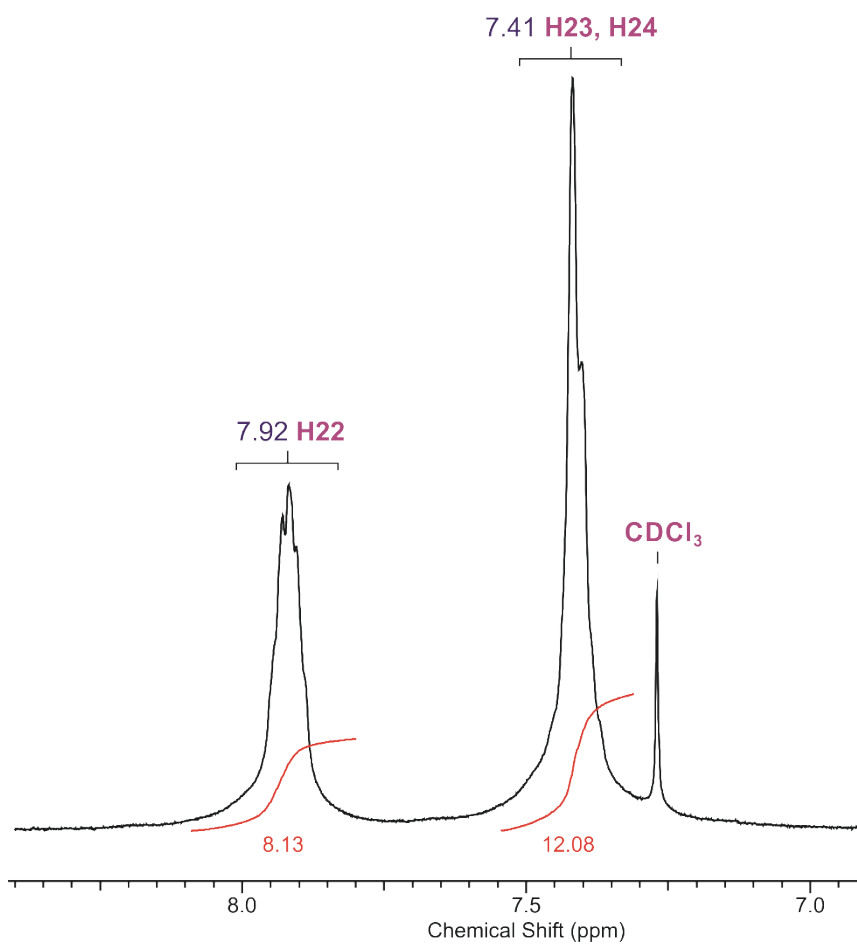

**Fig. S36** <sup>1</sup>H NMR spectrum of [RuCl<sub>2</sub>(PPh<sub>2</sub>{CH<sub>2</sub>N(CH<sub>2</sub>CH<sub>2</sub>)<sub>2</sub>NCH<sub>2</sub>CH<sub>3</sub>})<sub>2</sub>] (**3A**) (aromatic region).

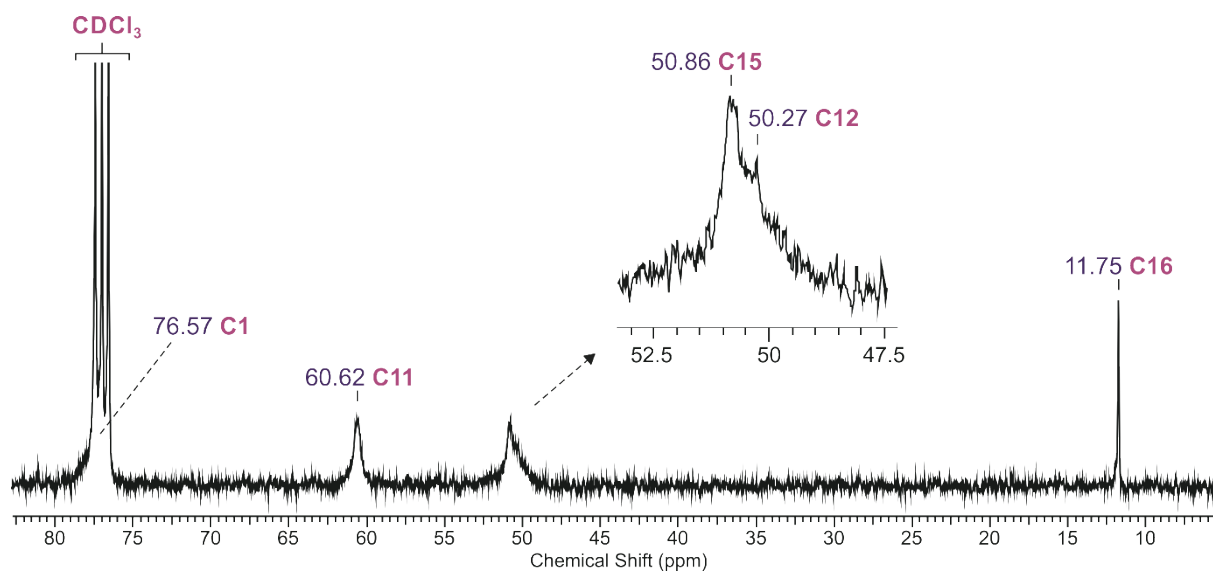

**Fig. S37** <sup>13</sup>C NMR spectrum of [RuCl<sub>2</sub>(PPh<sub>2</sub>{CH<sub>2</sub>N(CH<sub>2</sub>CH<sub>2</sub>)<sub>2</sub>NCH<sub>2</sub>CH<sub>3</sub>})<sub>2</sub>] (**3A**) (aliphatic region).

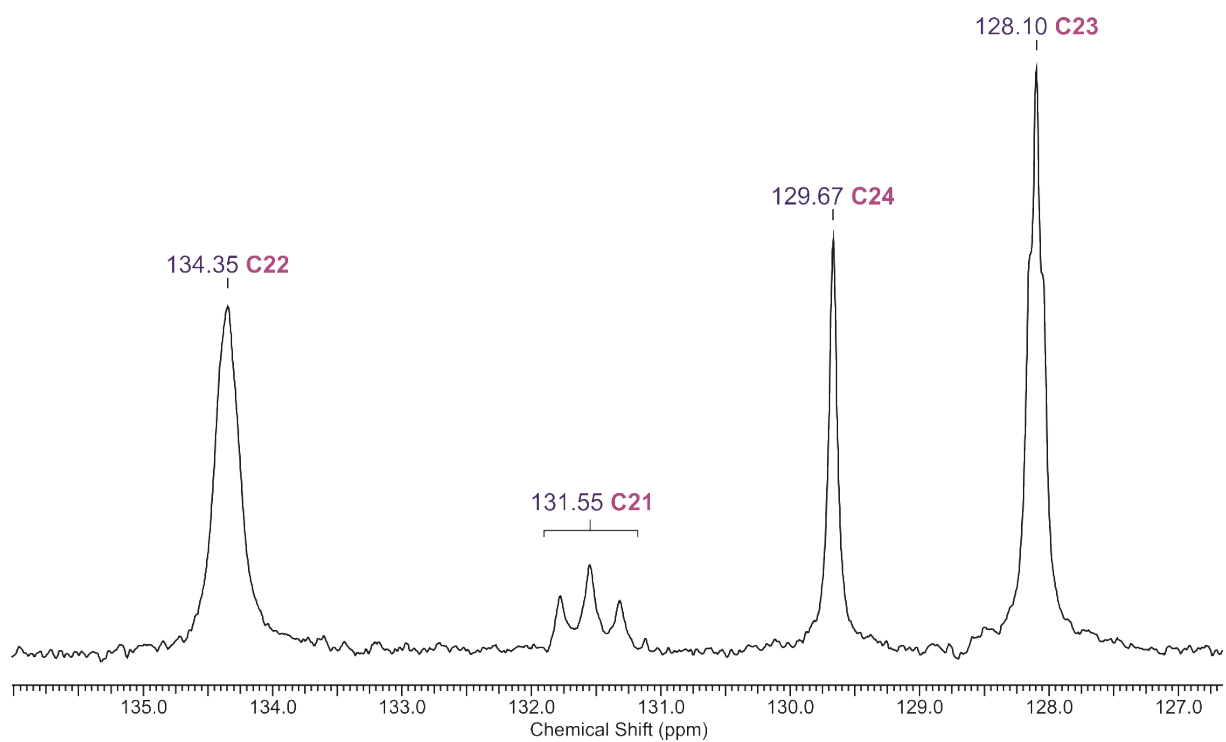

**Fig. S38**  $^{13}\text{C}$ NMR spectrum of  $[\text{RuCl}_2(\text{PPh}_2\{\text{CH}_2\text{N}(\text{CH}_2\text{CH}_2)_2\text{NCH}_2\text{CH}_3\})_2]$  (**3A**) (aromatic region).

**Table S1.** Comparison of NMR data for P{CH<sub>2</sub>N(CH<sub>2</sub>CH<sub>2</sub>)<sub>2</sub>O}<sub>3</sub> (**1**), OP{CH<sub>2</sub>N(CH<sub>2</sub>CH<sub>2</sub>)<sub>2</sub>O}<sub>3</sub> (**10**) and [RuCl<sub>2</sub>(P{CH<sub>2</sub>N(CH<sub>2</sub>CH<sub>2</sub>)<sub>2</sub>O}<sub>3</sub>)<sub>2</sub>] (**1A**).

|                                          | P{CH <sub>2</sub> N(CH <sub>2</sub> CH <sub>2</sub> ) <sub>2</sub> O} <sub>3</sub> ( <b>1</b> ) |                                                          | OP{CH <sub>2</sub> N(CH <sub>2</sub> CH <sub>2</sub> ) <sub>2</sub> O} <sub>3</sub> ( <b>10</b> ) |                                                          | [RuCl <sub>2</sub> (P{CH <sub>2</sub> N(CH <sub>2</sub> CH <sub>2</sub> ) <sub>2</sub> O} <sub>3</sub> ) <sub>2</sub> ] ( <b>1A</b> ) |                                                                 |
|------------------------------------------|-------------------------------------------------------------------------------------------------|----------------------------------------------------------|---------------------------------------------------------------------------------------------------|----------------------------------------------------------|---------------------------------------------------------------------------------------------------------------------------------------|-----------------------------------------------------------------|
|                                          | σ [ppm]                                                                                         | multiplicity<br>J [Hz]                                   | σ [ppm]                                                                                           | multiplicity<br>J [Hz]                                   | σ [ppm]                                                                                                                               | multiplicity<br>J [Hz]                                          |
| <i><sup>1</sup>H NMR</i>                 |                                                                                                 |                                                          |                                                                                                   |                                                          |                                                                                                                                       |                                                                 |
| H <sup>1</sup>                           | 2.59 (6H)                                                                                       | d <sup>2</sup> J(H <sup>1</sup> -P <sup>1</sup> ) = 2.1  | 2.83 (6H)                                                                                         | d <sup>2</sup> J(H <sup>1</sup> -P <sup>1</sup> ) = 6.8  | 4.41 (2H*)                                                                                                                            | bm                                                              |
| H <sup>11</sup>                          | 2.50 (12H)                                                                                      | m                                                        | 2.65 (12H)                                                                                        | bs                                                       | 1.91 (2H)<br>3.08 (2H)                                                                                                                | m<br>d <sup>3</sup> J(H <sup>11</sup> -H <sup>12</sup> ) = 11.9 |
| H <sup>12</sup>                          | 3.63 (12H)                                                                                      | m                                                        | 3.67 (12H)                                                                                        | bt                                                       | 3.46 (4H)                                                                                                                             | m                                                               |
| H <sup>2</sup>                           | -                                                                                               | -                                                        | -                                                                                                 | -                                                        | 3.54 (2H)<br>3.74 (2H)                                                                                                                | m<br>s                                                          |
| H <sup>21</sup>                          | -                                                                                               | -                                                        | -                                                                                                 | -                                                        | 2.74 (8H)                                                                                                                             | m                                                               |
| H <sup>22</sup>                          | -                                                                                               | -                                                        | -                                                                                                 | -                                                        | 3.68 (8H)                                                                                                                             | m                                                               |
| <i><sup>13</sup>C{<sup>1</sup>H} NMR</i> |                                                                                                 |                                                          |                                                                                                   |                                                          |                                                                                                                                       |                                                                 |
| C <sup>1</sup>                           | 55.8                                                                                            | d <sup>1</sup> J(C <sup>1</sup> -P <sup>1</sup> ) = 7.8  | 53.9                                                                                              | d <sup>1</sup> J(C <sup>1</sup> -P <sup>1</sup> ) = 82.3 | 72.5                                                                                                                                  | T 12.7                                                          |
| C <sup>11</sup>                          | 54.6                                                                                            | d <sup>3</sup> J(C <sup>11</sup> -P <sup>1</sup> ) = 8.3 | 55.9                                                                                              | d <sup>3</sup> J(C <sup>11</sup> -P <sup>1</sup> ) = 7.2 | 60.2                                                                                                                                  | T 2.8                                                           |
| C <sup>12</sup>                          | 66.5                                                                                            | s                                                        | 67.0                                                                                              | s                                                        | 64.3                                                                                                                                  | s                                                               |
| C <sup>2</sup>                           | -                                                                                               | -                                                        | -                                                                                                 | -                                                        | 49.7                                                                                                                                  | T 14.3                                                          |
| C <sup>21</sup>                          | -                                                                                               | -                                                        | -                                                                                                 | -                                                        | 55.3                                                                                                                                  | T 2.2                                                           |
| C <sup>22</sup>                          | -                                                                                               | -                                                        | -                                                                                                 | -                                                        | 66.8                                                                                                                                  | s                                                               |
| <i><sup>31</sup>P{<sup>1</sup>H} NMR</i> |                                                                                                 |                                                          |                                                                                                   |                                                          |                                                                                                                                       |                                                                 |
| P <sup>1</sup>                           | -61.47                                                                                          | s                                                        | 47.11                                                                                             | s                                                        | -19.61                                                                                                                                | s                                                               |

s – singlet, d – doublet, t – triplet, m – multiplet, b – broad, T – pseudo-triplets (virtual coupling)

\* - due to equivalency of the coordinated phosphane molecules, the relative intensities are given per one molecule

**Table S2.** Comparison of NMR data for PPh<sub>2</sub>{CH<sub>2</sub>N(CH<sub>2</sub>CH<sub>2</sub>)<sub>2</sub>O} (**2**), OPPh<sub>2</sub>{CH<sub>2</sub>N(CH<sub>2</sub>CH<sub>2</sub>)<sub>2</sub>O} (**2O**) and [RuCl<sub>2</sub>(PPh<sub>2</sub>{CH<sub>2</sub>N(CH<sub>2</sub>CH<sub>2</sub>)<sub>2</sub>O})<sub>2</sub>] (**2A**).

|                                                   | PPh <sub>2</sub> {CH <sub>2</sub> N(CH <sub>2</sub> CH <sub>2</sub> ) <sub>2</sub> O} ( <b>2</b> ) |                                                           | OPPh <sub>2</sub> {CH <sub>2</sub> N(CH <sub>2</sub> CH <sub>2</sub> ) <sub>2</sub> O} ( <b>2O</b> ) |                                                           | [RuCl <sub>2</sub> (PPh <sub>2</sub> {CH <sub>2</sub> N(CH <sub>2</sub> CH <sub>2</sub> ) <sub>2</sub> O}) <sub>2</sub> ] ( <b>2A</b> ) |                        |
|---------------------------------------------------|----------------------------------------------------------------------------------------------------|-----------------------------------------------------------|------------------------------------------------------------------------------------------------------|-----------------------------------------------------------|-----------------------------------------------------------------------------------------------------------------------------------------|------------------------|
|                                                   | σ [ppm]                                                                                            | multiplicity<br>J [Hz]                                    | σ [ppm]                                                                                              | multiplicity<br>J [Hz]                                    | σ [ppm]                                                                                                                                 | multiplicity<br>J [Hz] |
| <i><sup>1</sup>H</i> NMR                          |                                                                                                    |                                                           |                                                                                                      |                                                           |                                                                                                                                         |                        |
| H <sup>1</sup>                                    | 3.25 (2H)                                                                                          | d <sup>2</sup> J(H <sup>1</sup> -P <sup>1</sup> ) = 3.1   | 3.24 (2H)                                                                                            | d <sup>2</sup> J(H <sup>1</sup> -P <sup>1</sup> ) = 6.8   | 5.20 (2H*)                                                                                                                              | s                      |
| H <sup>11</sup>                                   | 2.71 (4H)                                                                                          | bt                                                        | 2.65 (4H)                                                                                            | t <sup>3</sup> J(H <sup>11</sup> -H <sup>12</sup> ) = 4.5 | 1.99 (2H)<br>3.34 (2H)                                                                                                                  | m<br>m                 |
| H <sup>12</sup>                                   | 3.75 (4H)                                                                                          | t <sup>3</sup> J(H <sup>12</sup> -H <sup>11</sup> ) = 4.7 | 3.64 (4H)                                                                                            | t <sup>3</sup> J(H <sup>11</sup> -H <sup>12</sup> ) = 4.5 | 3.34 (4H)                                                                                                                               | m                      |
| H <sup>22</sup>                                   | 7.53 (4H)                                                                                          | m                                                         | 7.81 (4H)                                                                                            | m                                                         | 7.90 (4H)                                                                                                                               | m                      |
| H <sup>23</sup> , H <sup>24</sup>                 | 7.36 (6H)                                                                                          | m                                                         | 7.50 (6H)                                                                                            | m                                                         | 7.43 (6H)                                                                                                                               | m                      |
| <i><sup>13</sup>C</i> { <i><sup>1</sup>H} NMR</i> |                                                                                                    |                                                           |                                                                                                      |                                                           |                                                                                                                                         |                        |
| C <sup>1</sup>                                    | 61.6                                                                                               | d <sup>1</sup> J(C <sup>1</sup> -P <sup>1</sup> ) = 3.6   | 58.7                                                                                                 | d <sup>1</sup> J(C <sup>1</sup> -P <sup>1</sup> ) = 87.9  | 75.4                                                                                                                                    | bT                     |
| C <sup>11</sup>                                   | 54.7                                                                                               | d <sup>3</sup> J(C <sup>11</sup> -P <sup>1</sup> ) = 9.1  | 55.7                                                                                                 | d <sup>3</sup> J(C <sup>11</sup> -P <sup>1</sup> ) = 7.9  | 60.8                                                                                                                                    | s                      |
| C <sup>12</sup>                                   | 66.7                                                                                               | s                                                         | 66.9                                                                                                 | s                                                         | 64.5                                                                                                                                    | s                      |
| C <sup>21</sup>                                   | 138.1                                                                                              | d <sup>1</sup> J(C <sup>21</sup> -P <sup>1</sup> ) = 12.7 | 132.3                                                                                                | d <sup>1</sup> J(C <sup>21</sup> -P <sup>1</sup> ) = 98.2 | 131.6                                                                                                                                   | T 17.7                 |
| C <sup>22</sup>                                   | 132.5                                                                                              | d <sup>2</sup> J(C <sup>22</sup> -P <sup>1</sup> ) = 18.2 | 131.2                                                                                                | d <sup>2</sup> J(C <sup>22</sup> -P <sup>1</sup> ) = 8.8  | 134.1                                                                                                                                   | T 5.0                  |
| C <sup>23</sup>                                   | 128.1                                                                                              | d <sup>3</sup> J(C <sup>23</sup> -P <sup>1</sup> ) = 6.4  | 128.5                                                                                                | d <sup>3</sup> J(C <sup>23</sup> -P <sup>1</sup> ) = 11.6 | 128.2                                                                                                                                   | T 3.9                  |
| C <sup>24</sup>                                   | 128.3                                                                                              | s                                                         | 131.9                                                                                                | d <sup>4</sup> J(C <sup>24</sup> -P <sup>1</sup> ) = 1.9  | 129.8                                                                                                                                   | s                      |
| <i><sup>31</sup>P</i> { <i><sup>1</sup>H} NMR</i> |                                                                                                    |                                                           |                                                                                                      |                                                           |                                                                                                                                         |                        |
| P <sup>1</sup>                                    | -27.65                                                                                             | s                                                         | 27.92                                                                                                | s                                                         | -23.68                                                                                                                                  | s                      |

s – singlet, d – doublet, t – triplet, m – multiplet, b - broad, T – pseudo-triplets (virtual coupling);

\* - due to equivalency of the coordinated phosphane molecules, the relative intensities are given per one molecule.

**Table S3.** Comparison of NMR data for PPh<sub>2</sub>{CH<sub>2</sub>N(CH<sub>2</sub>CH<sub>2</sub>)<sub>2</sub>NCH<sub>2</sub>CH<sub>3</sub>} (**3**), OPPh<sub>2</sub>{CH<sub>2</sub>N(CH<sub>2</sub>CH<sub>2</sub>)<sub>2</sub>NCH<sub>2</sub>CH<sub>3</sub>} (**30**) and [RuCl<sub>2</sub>(PPh<sub>2</sub>{CH<sub>2</sub>N(CH<sub>2</sub>CH<sub>2</sub>)<sub>2</sub>NCH<sub>2</sub>CH<sub>3</sub>)}<sub>2</sub>] (**3A**).

|                                                   | PPh <sub>2</sub> {CH <sub>2</sub> N(CH <sub>2</sub> CH <sub>2</sub> ) <sub>2</sub> NCH <sub>2</sub> CH <sub>3</sub> } ( <b>3</b> ) |                                                           | OPPh <sub>2</sub> {CH <sub>2</sub> N(CH <sub>2</sub> CH <sub>2</sub> ) <sub>2</sub> NCH <sub>2</sub> CH <sub>3</sub> } ( <b>30</b> ) |                                                           | [RuCl <sub>2</sub> (PPh <sub>2</sub> {CH <sub>2</sub> N(CH <sub>2</sub> CH <sub>2</sub> ) <sub>2</sub> NCH <sub>2</sub> CH <sub>3</sub> )} <sub>2</sub> ] ( <b>3A</b> ) |                        |
|---------------------------------------------------|------------------------------------------------------------------------------------------------------------------------------------|-----------------------------------------------------------|--------------------------------------------------------------------------------------------------------------------------------------|-----------------------------------------------------------|-------------------------------------------------------------------------------------------------------------------------------------------------------------------------|------------------------|
|                                                   | $\sigma$ [ppm]                                                                                                                     | multiplicity<br>J [Hz]                                    | $\sigma$ [ppm]                                                                                                                       | multiplicity<br>J [Hz]                                    | $\sigma$ [ppm]                                                                                                                                                          | multiplicity<br>J [Hz] |
| <i><sup>1</sup>H</i> NMR                          |                                                                                                                                    |                                                           |                                                                                                                                      |                                                           |                                                                                                                                                                         |                        |
| H <sup>1</sup>                                    | 3.24 (2H)                                                                                                                          | d <sup>2</sup> J(H <sup>1</sup> -P <sup>1</sup> ) = 2.9   | 3.23 (2H)                                                                                                                            | d <sup>2</sup> J(H <sup>1</sup> -P <sup>1</sup> ) = 6.8   | 5.21 (2H*)                                                                                                                                                              | s                      |
| H <sup>11</sup>                                   | 2.73 (4H)                                                                                                                          | bm                                                        | 2.67 (4H)                                                                                                                            | bm                                                        | 1.76 (1H)<br>2.22 (1H)<br>3.43 (2H)                                                                                                                                     | bm<br>bm<br>bm         |
| H <sup>12</sup>                                   | 2.50 (4H)                                                                                                                          | bm                                                        | 2.39 (4H)                                                                                                                            | bm                                                        | 2.08 (2H)<br>2.22 (2H)                                                                                                                                                  | bm<br>bm               |
| H <sup>15</sup>                                   | 2.41 (2H)                                                                                                                          | q <sup>3</sup> J(H <sup>15</sup> -H <sup>16</sup> ) = 7.3 | 2.35 (2H)                                                                                                                            | q <sup>3</sup> J(H <sup>15</sup> -H <sup>16</sup> ) = 7.2 | 1.59 (2H)                                                                                                                                                               | bm                     |
| H <sup>16</sup>                                   | 1.09 (3H)                                                                                                                          | t <sup>3</sup> J(H <sup>16</sup> -H <sup>15</sup> ) = 7.3 | 1.03 (3H)                                                                                                                            | t <sup>3</sup> J(H <sup>16</sup> -H <sup>15</sup> ) = 7.2 | 0.73 (3H)                                                                                                                                                               | bs                     |
| H <sup>22</sup>                                   | 7.47 (4H)                                                                                                                          | m                                                         | 7.80 (4H)                                                                                                                            | m                                                         | 7.92 (4H)                                                                                                                                                               | m                      |
| H <sup>23</sup> , H <sup>24</sup>                 | 7.31 (6H)                                                                                                                          | m                                                         | 7.46 (6H)                                                                                                                            | m                                                         | 7.41 (6H)                                                                                                                                                               | m                      |
| <i><sup>13</sup>C</i> { <i><sup>1</sup>H} NMR</i> |                                                                                                                                    |                                                           |                                                                                                                                      |                                                           |                                                                                                                                                                         |                        |
| C <sup>1</sup>                                    | 61.3                                                                                                                               | d <sup>1</sup> J(C <sup>1</sup> -P <sup>1</sup> ) = 3.6   | 58.4                                                                                                                                 | d <sup>1</sup> J(C <sup>1</sup> -P <sup>1</sup> ) = 88.4  | 76.6 under CDCl <sub>3</sub>                                                                                                                                            | -                      |
| C <sup>11</sup>                                   | 54.3                                                                                                                               | d <sup>3</sup> J(C <sup>11</sup> -P <sup>1</sup> ) = 9.1  | 55.4                                                                                                                                 | d <sup>3</sup> J(C <sup>11</sup> -P <sup>1</sup> ) = 7.9  | 60.6                                                                                                                                                                    | bm                     |
| C <sup>12</sup>                                   | 52.6                                                                                                                               | s                                                         | 52.7                                                                                                                                 | s                                                         | 50.3                                                                                                                                                                    | bm                     |
| C <sup>15</sup>                                   | 52.0                                                                                                                               | s                                                         | 52.1                                                                                                                                 | s                                                         | 50.9                                                                                                                                                                    | bm                     |
| C <sup>16</sup>                                   | 11.8                                                                                                                               | s                                                         | 11.9                                                                                                                                 | s                                                         | 11.8                                                                                                                                                                    | s                      |
| C <sup>21</sup>                                   | 138.4                                                                                                                              | d <sup>1</sup> J(C <sup>21</sup> -P <sup>1</sup> ) = 12.7 | 132.5                                                                                                                                | d <sup>1</sup> J(C <sup>21</sup> -P <sup>1</sup> ) = 97.2 | 131.6                                                                                                                                                                   | T 17.2                 |
| C <sup>22</sup>                                   | 132.6                                                                                                                              | d <sup>2</sup> J(C <sup>22</sup> -P <sup>1</sup> ) = 18.2 | 131.2                                                                                                                                | d <sup>2</sup> J(C <sup>22</sup> -P <sup>1</sup> ) = 8.8  | 134.4                                                                                                                                                                   | bm                     |
| C <sup>23</sup>                                   | 128.1                                                                                                                              | d <sup>3</sup> J(C <sup>23</sup> -P <sup>1</sup> ) = 6.4  | 128.4                                                                                                                                | d <sup>3</sup> J(C <sup>23</sup> -P <sup>1</sup> ) = 11.6 | 128.1                                                                                                                                                                   | bm                     |
| C <sup>24</sup>                                   | 128.2                                                                                                                              | s                                                         | 131.7                                                                                                                                | d <sup>4</sup> J(C <sup>24</sup> -P <sup>1</sup> ) = 1.4  | 129.7                                                                                                                                                                   | s                      |
| <i><sup>31</sup>P</i> { <i><sup>1</sup>H} NMR</i> |                                                                                                                                    |                                                           |                                                                                                                                      |                                                           |                                                                                                                                                                         |                        |
| P <sup>1</sup>                                    | -26.69                                                                                                                             | s                                                         | 27.58                                                                                                                                | s                                                         | -25.28                                                                                                                                                                  | s                      |

s – singlet, d – doublet, t – triplet, m – multiplet, b – broad, T – pseudo-triplets (virtual coupling)

\* - due to equivalency of the coordinated phosphane molecules, the relative intensities are given per one molecule

**Table S4.** Crystallographic experimental details.

| Parameters                                            | <b>1A</b>                                                                                                      | <b>2A</b>                                                                                                      | <b>2B</b> ·2CH <sub>3</sub> CN                                                                                | <b>3A</b> ·2CH <sub>3</sub> OH·2H <sub>2</sub> O                                                               | <b>3B</b> ·CHCl <sub>3</sub>                                                                                   |
|-------------------------------------------------------|----------------------------------------------------------------------------------------------------------------|----------------------------------------------------------------------------------------------------------------|---------------------------------------------------------------------------------------------------------------|----------------------------------------------------------------------------------------------------------------|----------------------------------------------------------------------------------------------------------------|
| Moiety formula                                        | RuCl <sub>2</sub> C <sub>30</sub> H <sub>60</sub> N <sub>6</sub> O <sub>6</sub> P <sub>2</sub>                 | RuCl <sub>2</sub> C <sub>34</sub> H <sub>40</sub> N <sub>2</sub> O <sub>2</sub> P <sub>2</sub>                 | RuCl <sub>2</sub> C <sub>42</sub> H <sub>52</sub> N <sub>6</sub> O <sub>2</sub> P <sub>2</sub>                | RuCl <sub>2</sub> C <sub>40</sub> H <sub>62</sub> N <sub>4</sub> O <sub>4</sub> P <sub>2</sub>                 | RuCl <sub>5</sub> C <sub>43</sub> H <sub>57</sub> N <sub>6</sub> P <sub>2</sub>                                |
| Formula weight (g·mol <sup>-1</sup> )                 | 834.76                                                                                                         | 742.62                                                                                                         | 906.80                                                                                                        | 896.87                                                                                                         | 998.23                                                                                                         |
| Crystal description                                   | yellow-orange blocks                                                                                           | yellow-orange blocks                                                                                           | yellow needles                                                                                                | yellow-orange blocks                                                                                           | yellow needles                                                                                                 |
| Temperature (K)                                       | 132                                                                                                            | 120                                                                                                            | 100                                                                                                           | 293                                                                                                            | 293                                                                                                            |
| Type of radiation                                     | Cu K $\alpha$                                                                                                  | Mo K $\alpha$                                                                                                  | Mo K $\alpha$                                                                                                 | Mo K $\alpha$                                                                                                  | Mo K $\alpha$                                                                                                  |
| Crystal system                                        | monoclinic                                                                                                     | monoclinic                                                                                                     | monoclinic                                                                                                    | monoclinic                                                                                                     | monoclinic                                                                                                     |
| Space group                                           | P2 <sub>1</sub> /n                                                                                             | P2 <sub>1</sub> /n                                                                                             | C2/c                                                                                                          | C2/c                                                                                                           | P2 <sub>1</sub> /m                                                                                             |
| Unit cell dimensions                                  |                                                                                                                |                                                                                                                |                                                                                                               |                                                                                                                |                                                                                                                |
| a (Å)                                                 | 10.2331(1)                                                                                                     | 11.7180(3)                                                                                                     | 11.7701(3)                                                                                                    | 25.716(3)                                                                                                      | 9.2987(6)                                                                                                      |
| b (Å)                                                 | 17.3721(2)                                                                                                     | 10.6960(3)                                                                                                     | 15.4658(4)                                                                                                    | 10.5327(10)                                                                                                    | 25.2380(16)                                                                                                    |
| c (Å)                                                 | 10.6544(2)                                                                                                     | 13.4140(4)                                                                                                     | 23.8880(5)                                                                                                    | 15.7639(15)                                                                                                    | 10.4915(7)                                                                                                     |
| $\beta$ (°)                                           | 92.496(1)                                                                                                      | 104.386(2)                                                                                                     | 101.725(2)                                                                                                    | 91.084(9)                                                                                                      | 100.394(5)                                                                                                     |
| Volume (Å <sup>3</sup> )                              | 1892.2(1)                                                                                                      | 1628.5(1)                                                                                                      | 4257.7(2)                                                                                                     | 4269.0(8)                                                                                                      | 2421.7(3)                                                                                                      |
| Z                                                     | 2                                                                                                              | 2                                                                                                              | 4                                                                                                             | 4                                                                                                              | 2                                                                                                              |
| Density calc. (Mg/ m <sup>3</sup> )                   | 1.465                                                                                                          | 1.514                                                                                                          | 1.415                                                                                                         | 1.395                                                                                                          | 1.396                                                                                                          |
| Absorption coeff. (mm <sup>-1</sup> )                 | 5.849                                                                                                          | 0.778                                                                                                          | 0.612                                                                                                         | 0.611                                                                                                          | 0.702                                                                                                          |
| F(000)                                                | 876                                                                                                            | 764                                                                                                            | 1880                                                                                                          | 1880                                                                                                           | 1032                                                                                                           |
| $\theta_{\min} - \theta_{\max}$ (°)                   | 4.87 to 71.32                                                                                                  | 2.81 to 27.46                                                                                                  | 3.02 to 31.89                                                                                                 | 3.06 to 36.87                                                                                                  | 2.81 to 36.79                                                                                                  |
| hkl range                                             | -12 $\leftarrow$ h $\leftarrow$ 12<br>-21 $\leftarrow$ k $\leftarrow$ 21<br>-13 $\leftarrow$ l $\leftarrow$ 12 | -15 $\leftarrow$ h $\leftarrow$ 15<br>-13 $\leftarrow$ k $\leftarrow$ 13<br>-17 $\leftarrow$ l $\leftarrow$ 17 | -17 $\leftarrow$ h $\leftarrow$ 4<br>-11 $\leftarrow$ k $\leftarrow$ 19<br>-29 $\leftarrow$ l $\leftarrow$ 35 | -34 $\leftarrow$ h $\leftarrow$ 43<br>-10 $\leftarrow$ k $\leftarrow$ 15<br>-24 $\leftarrow$ l $\leftarrow$ 21 | -11 $\leftarrow$ h $\leftarrow$ 14<br>-34 $\leftarrow$ k $\leftarrow$ 33<br>-14 $\leftarrow$ l $\leftarrow$ 16 |
| Reflections collected                                 | 27311                                                                                                          | 13237                                                                                                          | 9470                                                                                                          | 19269                                                                                                          | 26561                                                                                                          |
| Independent reflections                               | 3657                                                                                                           | 3718                                                                                                           | 6038                                                                                                          | 6956                                                                                                           | 7510                                                                                                           |
| R <sub>int</sub>                                      | 0.0493                                                                                                         | 0.0354                                                                                                         | 0.0202                                                                                                        | 0.0975                                                                                                         | 0.0454                                                                                                         |
| Completeness to $\theta_{\max}$ (%)                   | 99.7                                                                                                           | 99.8                                                                                                           | 95.7                                                                                                          | 99.3                                                                                                           | 99.6                                                                                                           |
| Absorption correction type                            | multi-scan                                                                                                     | multi-scan                                                                                                     | multi-scan                                                                                                    | multi-scan                                                                                                     | multi-scan                                                                                                     |
| T <sub>max</sub> and T <sub>min</sub>                 | 1.000 and 0.620                                                                                                | 1.000 and 0.579                                                                                                | 1.0000 and 0.9783                                                                                             | 1.0000 and 0.8713                                                                                              | 1.000 and 0.8855                                                                                               |
| Data/restraints/parameters                            | 3657 / 0 / 214                                                                                                 | 3718 / 0 / 196                                                                                                 | 6038 / 0 / 252                                                                                                | 6956 / 3 / 271                                                                                                 | 7510 / 0 / 276                                                                                                 |
| Goodness of fit F <sup>2</sup>                        | 1.065                                                                                                          | 1.091                                                                                                          | 1.041                                                                                                         | 0.972                                                                                                          | 1.023                                                                                                          |
| R <sub>1</sub> , wR <sub>2</sub> [I > 2 $\sigma$ (I)] | 0.0257, 0.0625                                                                                                 | 0.0288, 0.0656                                                                                                 | 0.0402, 0.0978                                                                                                | 0.0971, 0.2263                                                                                                 | 0.0465, 0.0989                                                                                                 |
| R <sub>1</sub> , wR <sub>2</sub> (all data)           | 0.0306, 0.0659                                                                                                 | 0.0392, 0.0703                                                                                                 | 0.0505, 0.1053                                                                                                | 0.1713, 0.2634                                                                                                 | 0.0599, 0.1054                                                                                                 |
| Largest diff. peak and hole (e Å <sup>-3</sup> )      | 0.780, -0.524                                                                                                  | 0.824, -0.803                                                                                                  | 1.110, -0.641                                                                                                 | 6.759, -1.397                                                                                                  | 0.877, -0.862                                                                                                  |

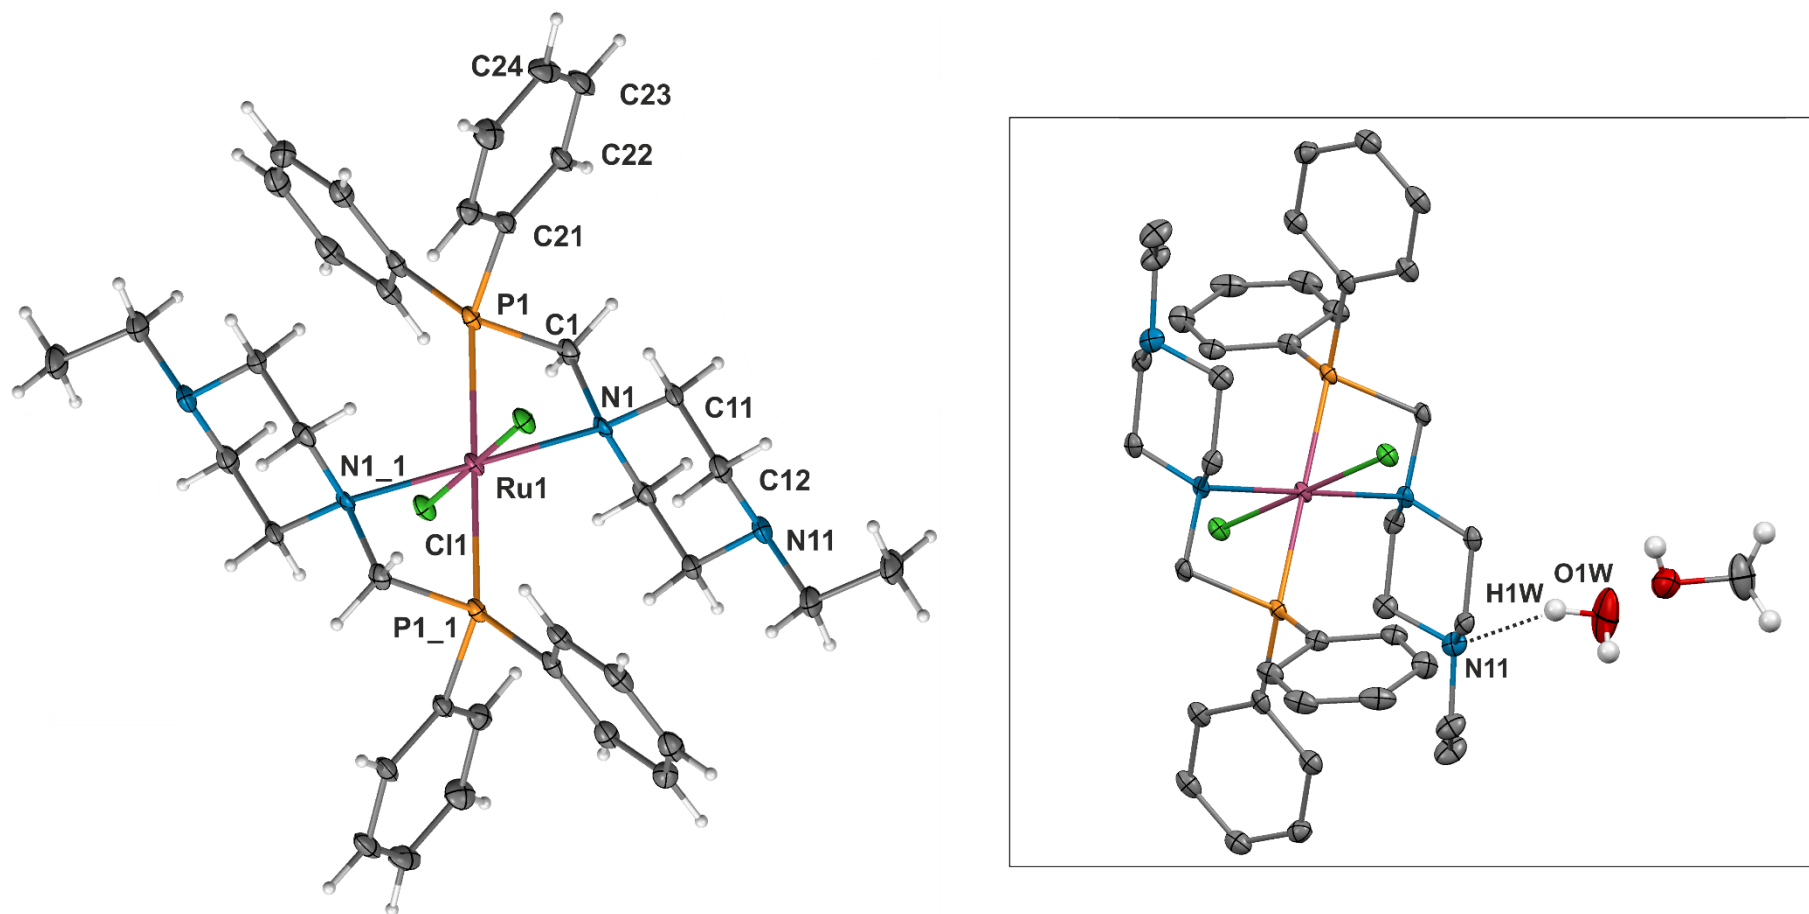

**Fig. S39** Two views (30% probability ellipsoids) of the **3A** molecule in **3A**·2CH<sub>3</sub>OH·2H<sub>2</sub>O complex with the atoms numeration scheme. Hydrogen atoms for view in frame were omitted for clarity. The hydrogen bond parameters: O1W-H1W···N11  $d(\text{D-H})=0.89(2)$  Å,  $d(\text{H}\cdots\text{A})=1.91(5)$  Å,  $d(\text{D}\cdots\text{A})=2.78(1)$  Å,  $\angle(\text{DHA})=162(13)^\circ$ .

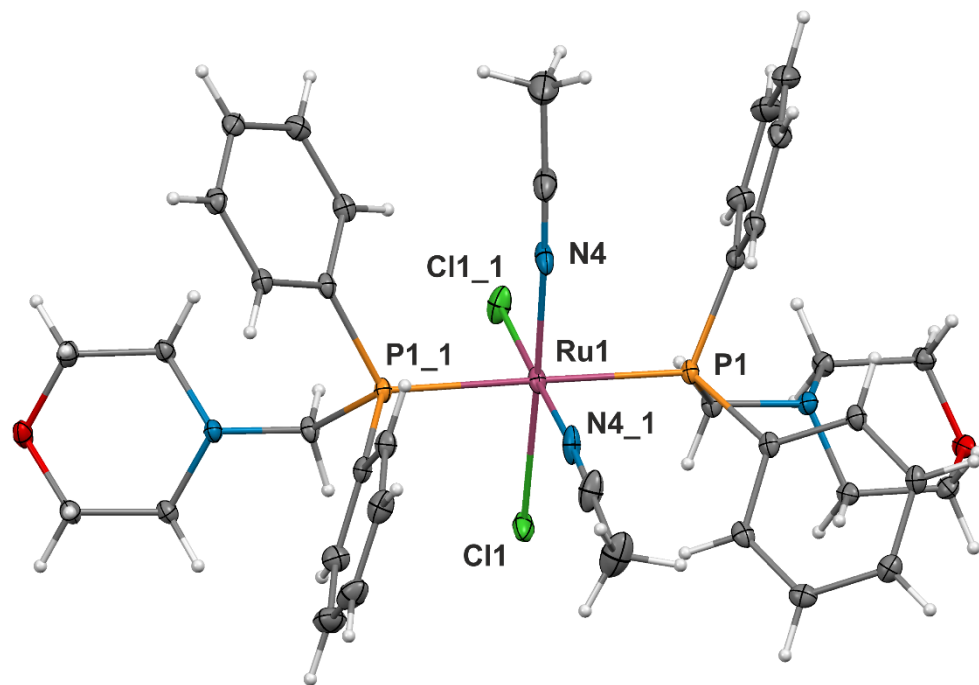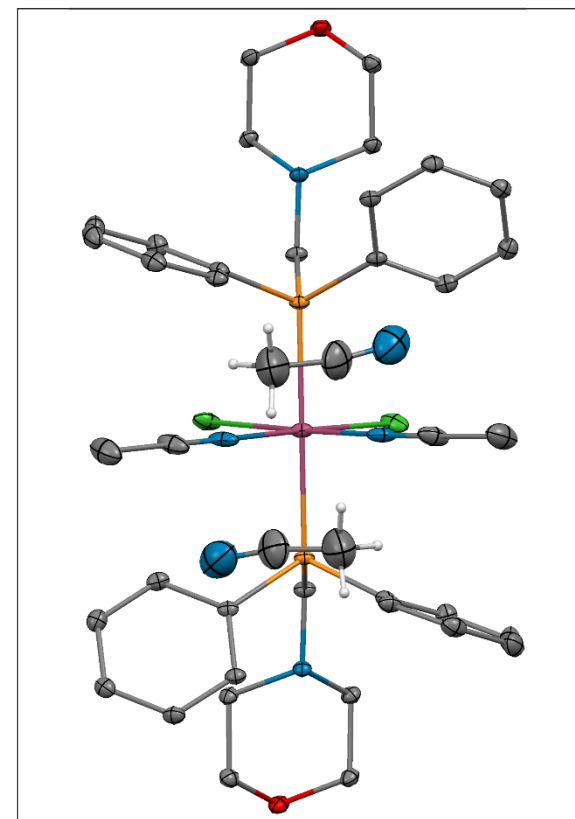

**Fig. S40** Two views (30% probability ellipsoids) of the **2B** molecule in **2B·2CH<sub>3</sub>CN** complex with the atoms numeration scheme. Hydrogen atoms for view in frame were omitted for clarity.



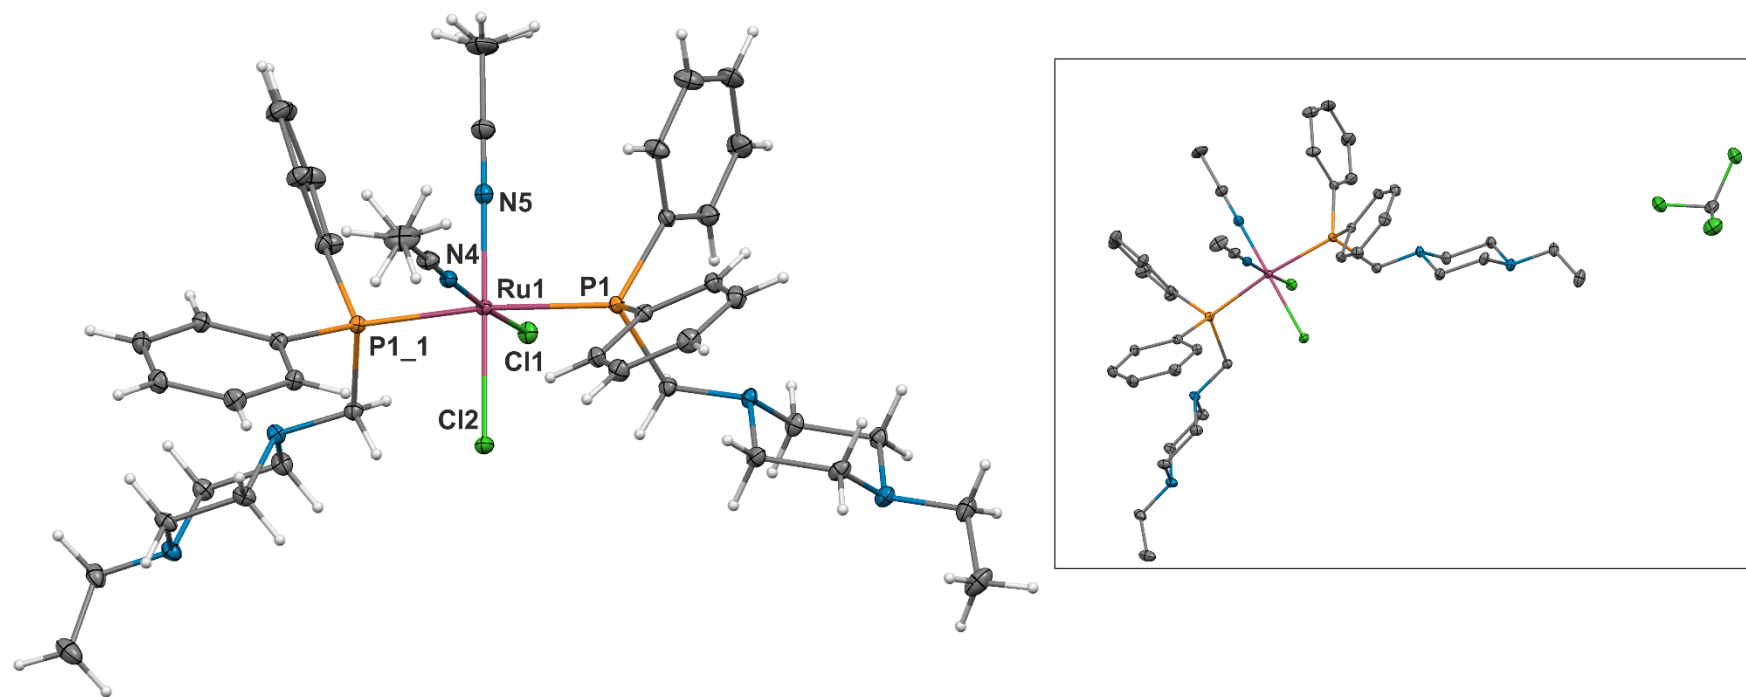

**Fig. S41** Two views (30% probability ellipsoids) of molecule **3B** in **3B**·CHCl<sub>3</sub> complex with the atoms numeration scheme. Hydrogen atoms for view in frame were omitted for clarity.
